# Supplementary material
Source: PubMed Central journal article supplement (PMC9343660)
Supplement: 41422_2022_676_MOESM1_ESM.pdf [file 41422_2022_676_MOESM1_ESM.pdf]

Supplementary information, Fig.S1

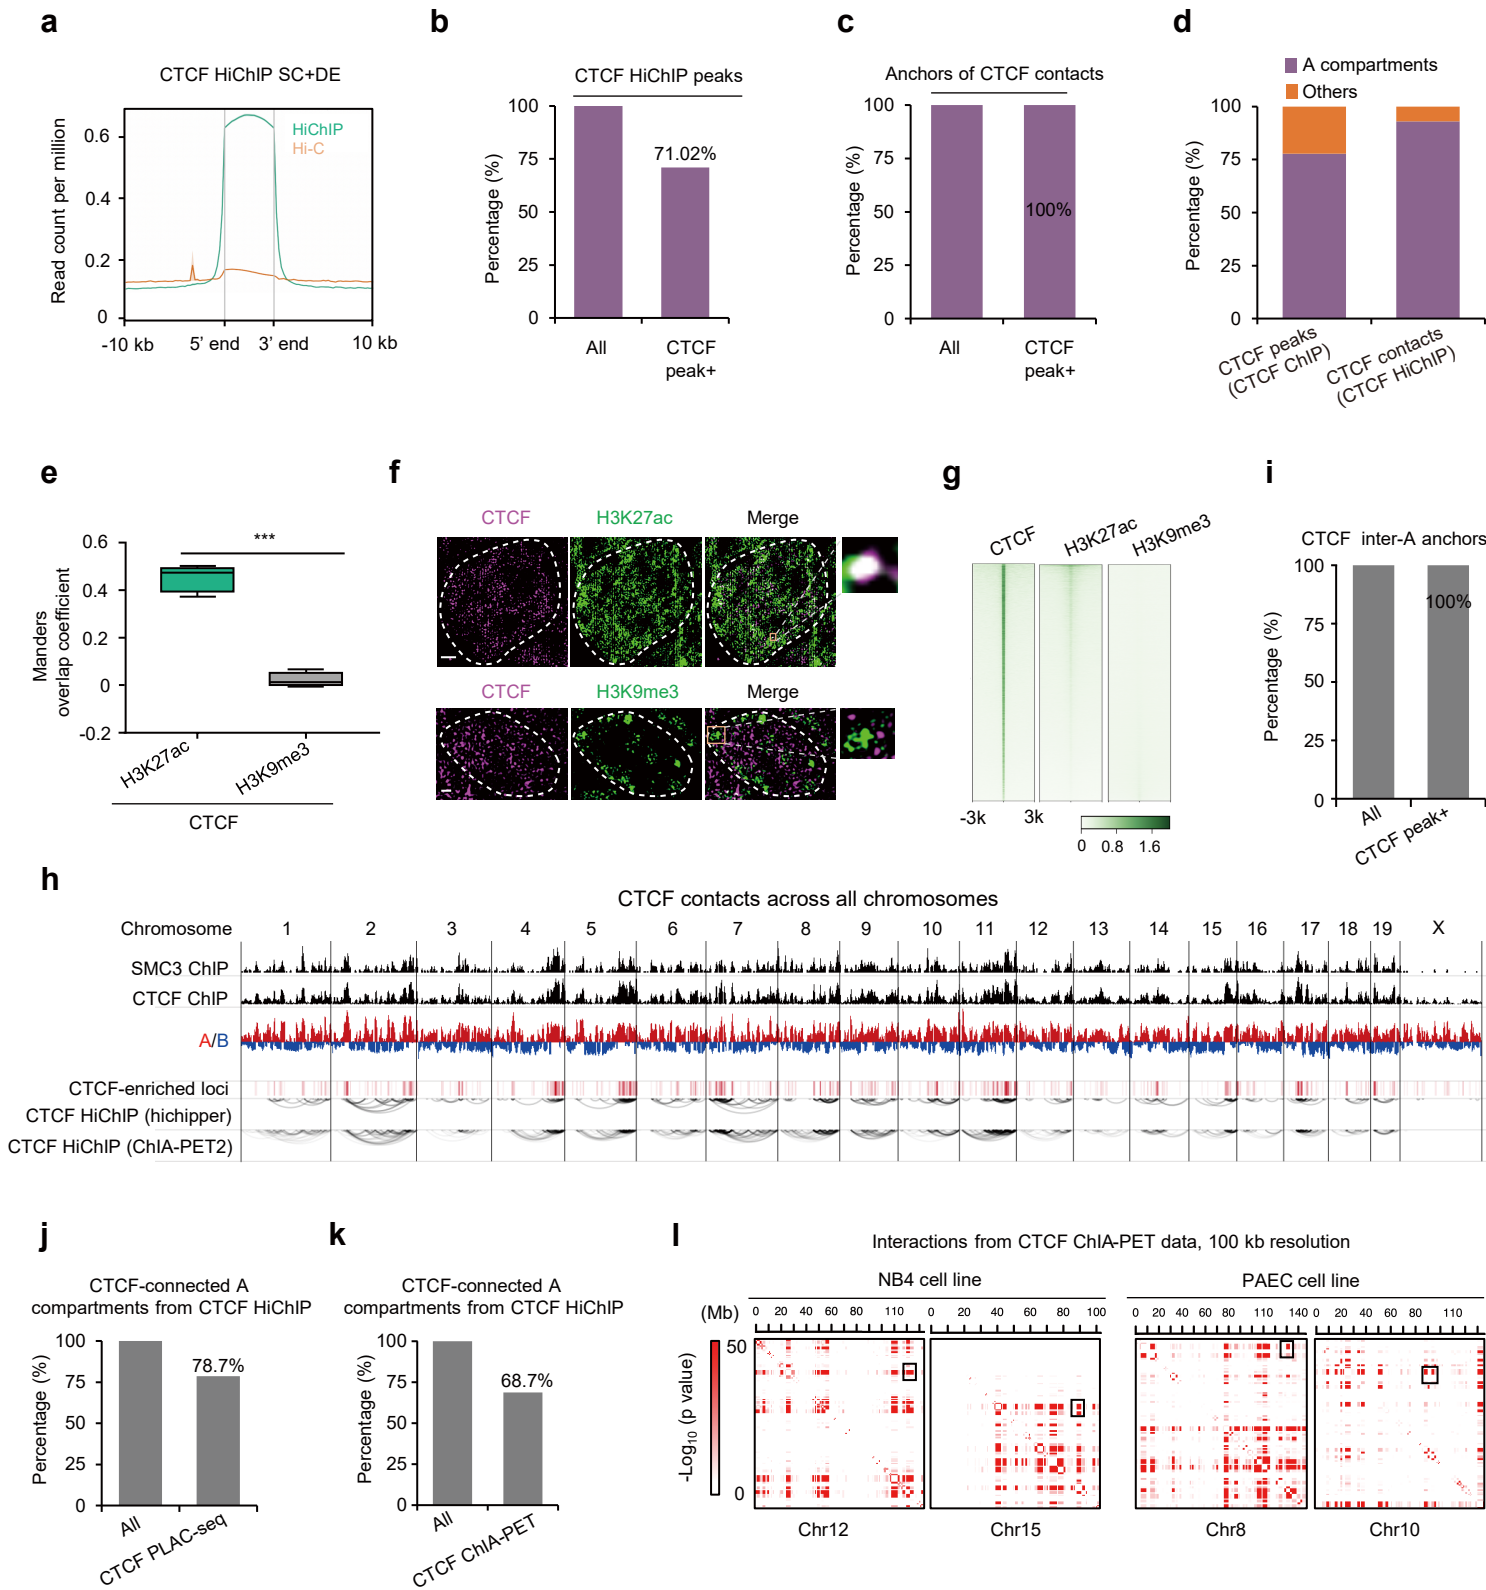

**m**

Inter-compartment interaction alteration after CTCF depletion (*Nora et al, 2017* Hi-C data)

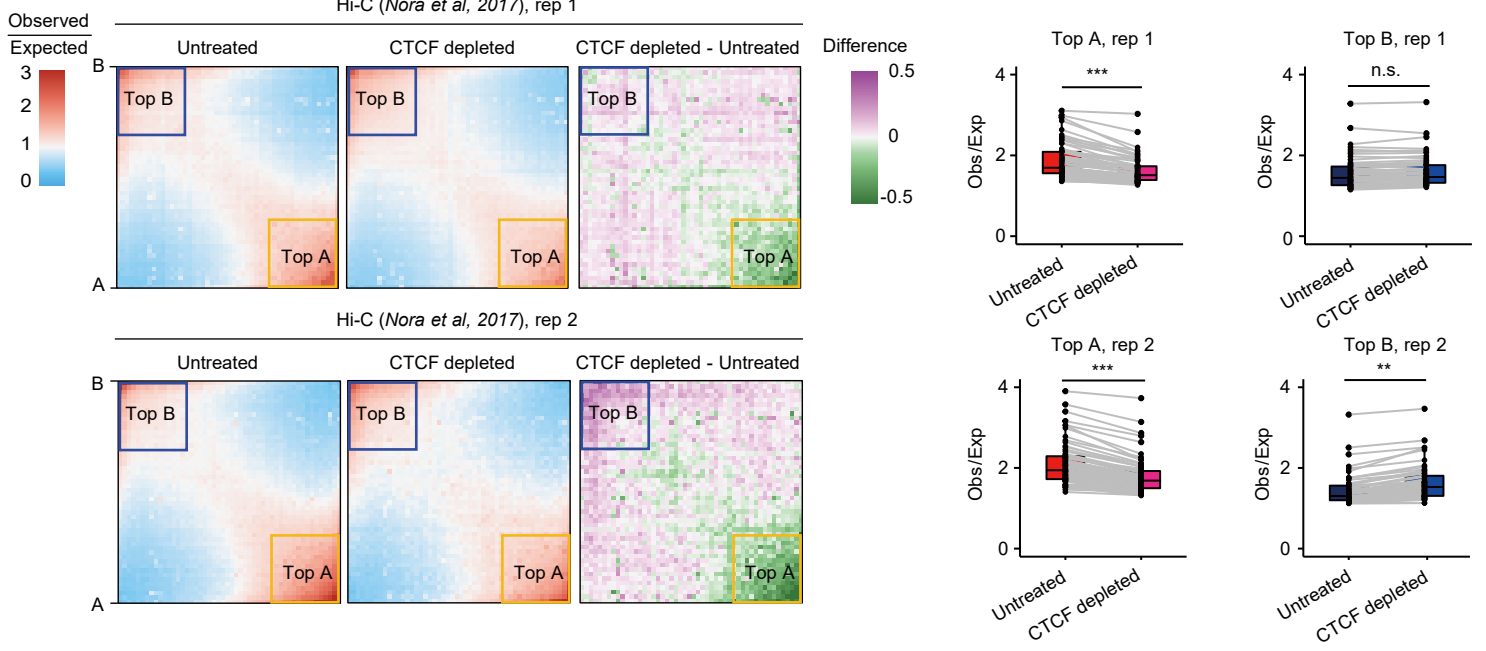

**n**

Inter-compartment interaction alteration after CTCF depletion (*Nora et al, 2020* Hi-C data)

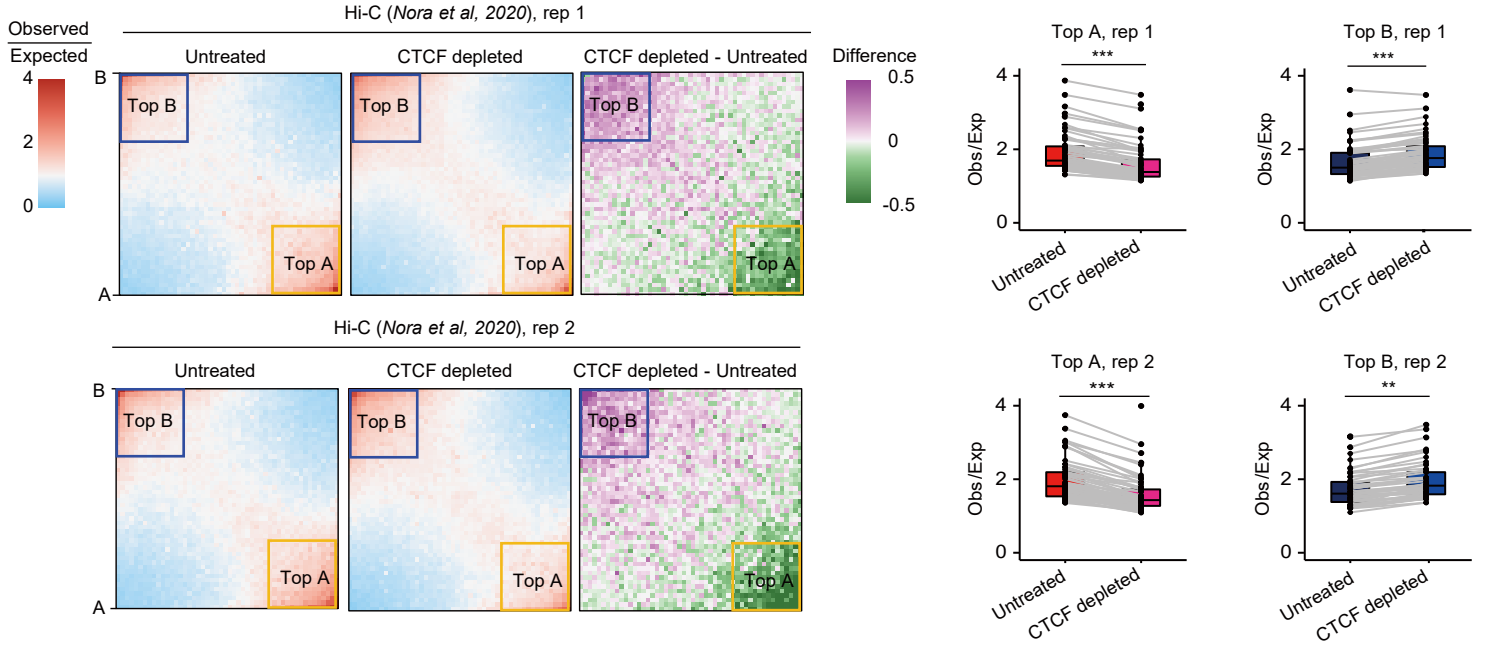

**o**

Distribution of common A compartment PC1 score after CTCF depletion (*Nora et al, 2017* Hi-C data)

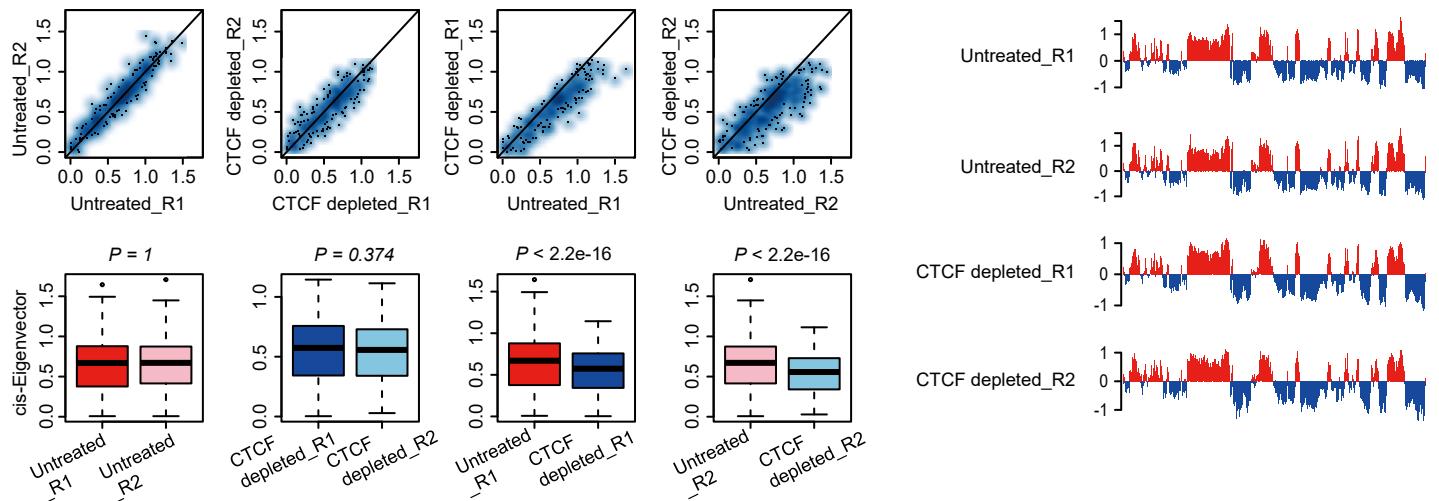

**p**

Distribution of common A compartment PC1 score after CTCF depletion  
(Nora et al, 2020 Hi-C data, public data processing pipeline)

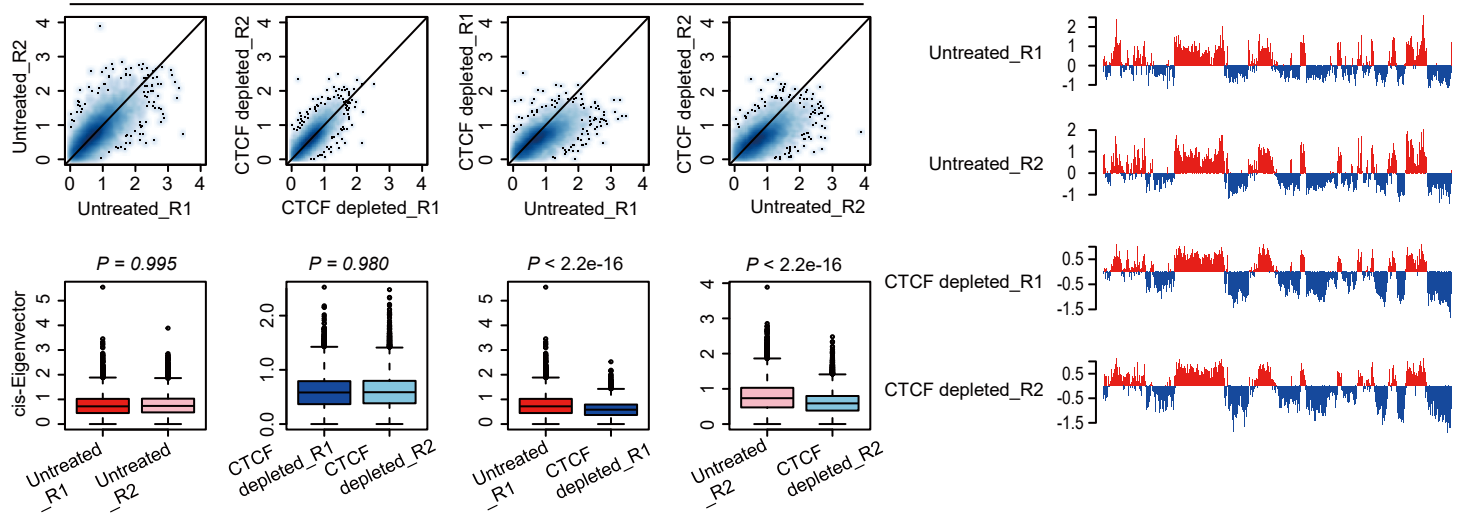**q**

Inter-compartment interactions

Nora et al, 2017 Hi-C data      Nora et al, 2020 Hi-C data

$P < 2.2e-16$

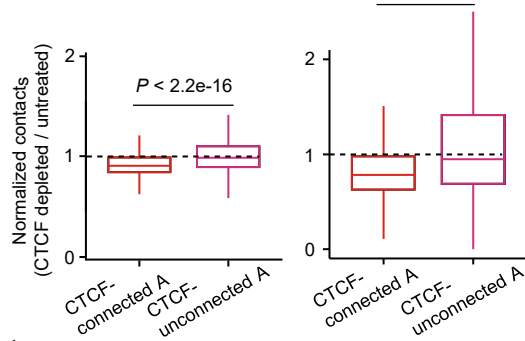**r**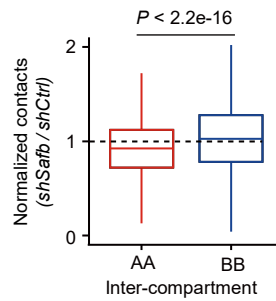**s**

Inter-A compartment interactions  
between CTCF-lacked loci

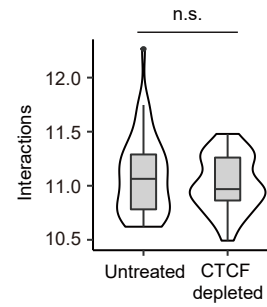

Inter-A compartment interactions

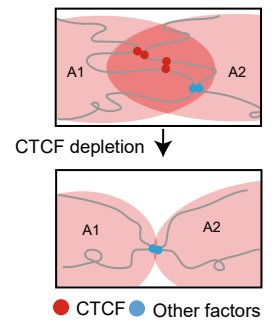**t**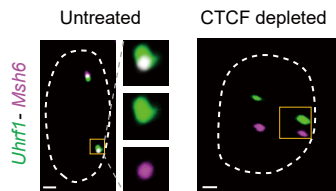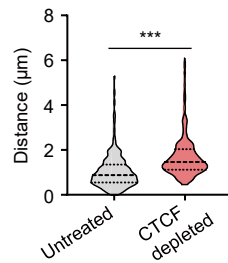**u**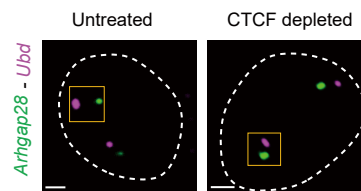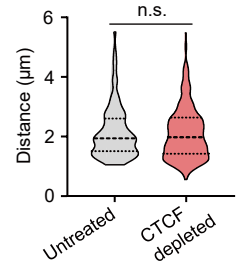

**Supplementary information, Fig.S1 CTCF organizes inter-A compartment interactions. a**

Enrichment of self-ligation signal (Dangling ends (DE) and Self Circle (SC)) at CTCF narrow peaks from CTCF ChIP-seq data (GSE29218) compared with CTCF HiChIP. **b** Percentage of CTCF HiChIP peaks with CTCF ChIP-seq peaks (GSE29218). **c** Percentage of CTCF contact anchors with CTCF ChIP-seq peaks (GSE29218). **d** Percentage of CTCF peaks from ChIP-seq data (GSE29218) and CTCF contacts from HiChIP data involved in A compartments. **e** Boxplot showing the Manders overlap coefficient between CTCF and histone modifications. Welch's *t*-test; H3K27ac, *n* = 103 cells; H3K9me3, *n* = 112 cells; *P* = 1.884e-06. **f** Representative immunofluorescence images showing the co-localization between CTCF and H3K27ac (top), CTCF and H3K9me3 (bottom) in ESCs, scale bar denotes 2  $\mu$ m. **g** Enrichment of H3K27ac (GSM851278) and H3K9me3 ChIP (GSM1003751) signal at CTCF ChIP-seq peaks (GSE29218). **h** CTCF contacts (CTCF HiChIP data) across all chromosomes. **i** Percentage of CTCF inter-A anchors with CTCF ChIP-seq peaks (GSE29218), the CTCF inter-A anchors were generated from CTCF HiChIP data. **j** Percentage of CTCF-connected A compartments (see methods) from CTCF HiChIP data that are also supported by CTCF PLAC-seq data (GSE119663). **k** Percentage of CTCF-connected A compartments from CTCF HiChIP data that are also supported by CTCF ChIA-PET data (GSM2645441). **l** CTCF ChIA-PET defined CTCF-connected regions in chr12, chr15 of NB4 (GSE137661) and in chr8, chr10 of PAEC (GSE139234). Black boxes denote the long-range interacted regions. **m** Saddle plots (left) and boxplots (right) showing the contact change between compartments with two replicates. Wilcoxon rank-sum test, Top A, rep 1: *P* = 6.066e-05; Top A, rep 2: *P* = 6.85e-06; Top B, rep 1: *P* = 0.1694; Top B, rep 2: *P* = 0.001268. Hi-C data were analyzed from the published literature of *Nora et al, 2017 (GSE98671)*. **n** Saddle plots (left) and boxplots (right) showing the contact change between compartments with two replicates. Wilcoxon rank-sum test, Top A, rep 1: *P* = 5.921e-06; Top A, rep 2: *P* = 3.783e-08; Top

B, rep 1:  $P = 0.0006229$ ; Top B, rep 2:  $P = 0.003635$ . Hi-C data were analyzed from the published literature of *Nora et al, 2020 (GSE156868)*. **o** Left: Scatter plots showing PC1 score of the common A compartments across the whole genome with two replicates. Right: PC1 score change of chromosome 17 before or after CTCF depletion with two replicates. Wilcoxon rank-sum test. Hi-C data from *Nora et al., 2017 (GSE98671)* were analyzed with our pipeline. **p** Left: Scatter plots showing PC1 score of the common A compartments across the whole genome with two replicates. Right: PC1 score change of chromosome 17 before and after CTCF depletion with two replicates, Wilcoxon rank-sum test; Hi-C data were analyzed with the pipeline from the published work (*GSE156868*). **q** Boxplot showing the normalized contact change among CTCF-connected and CTCF-unconnected A compartments after CTCF depletion (CTCF depleted / untreated). Hi-C data are from *Nora et al., 2017 (left, GSE98671)* and *Nora et al., 2020 (right, GSE156868)*. Wilcoxon rank-sum test. **r** Boxplot showing the normalized contacts among inter-A compartments after SAFB-deficiency (Hi-C data, *GSE125037*), Wilcoxon rank-sum test. **s** Left: Quantitation of aggregate peak analysis (APA) showing the genome-wide aggregate strength between CTCF-lacked loci (see methods) from different A compartments after CTCF depletion. Wilcoxon rank-sum test,  $P = 0.3565$ , Hi-C data are from *Nora et al., 2017 (GSE98671)*. Right: A model showing that CTCF mediates inter-A compartment interactions through CTCF-enriched loci, but the inter-A compartment interactions between CTCF-lacked loci also exist, which might be mediated by other factors. **t** The representative (left) images and quantification (right) of DNA FISH displaying distance change between *Uhrf1* (green) and *Msh6* (magenta) after CTCF depletion (Untreated:  $n = 205$ ; CTCF depleted:  $n = 186$ ;  $P = 1.906e-13$ ; Welch's  $t$ -test), the two genes localized in CTCF-enriched loci, the scale bars denote 2  $\mu\text{m}$ . **u** As a negative control, DNA FISH displaying the distance change between *Arhgap28* (green) and *Ubd* (magenta) after CTCF depletion, the two genes localize at different compartments, the scale bars denote 2  $\mu\text{m}$ . Right: quantification of the

distance change between the two genes. Welch's  $t$ -test; Untreated:  $n = 183$ ; CTCF depleted:  $n = 182$ ;  $P = 0.825$ .
