# Supplementary material
Source: PubMed Central journal article supplement (PMC9343660)
Supplement: 41422_2022_676_MOESM2_ESM.pdf [file 41422_2022_676_MOESM2_ESM.pdf]

# Supplementary information, Fig.S2

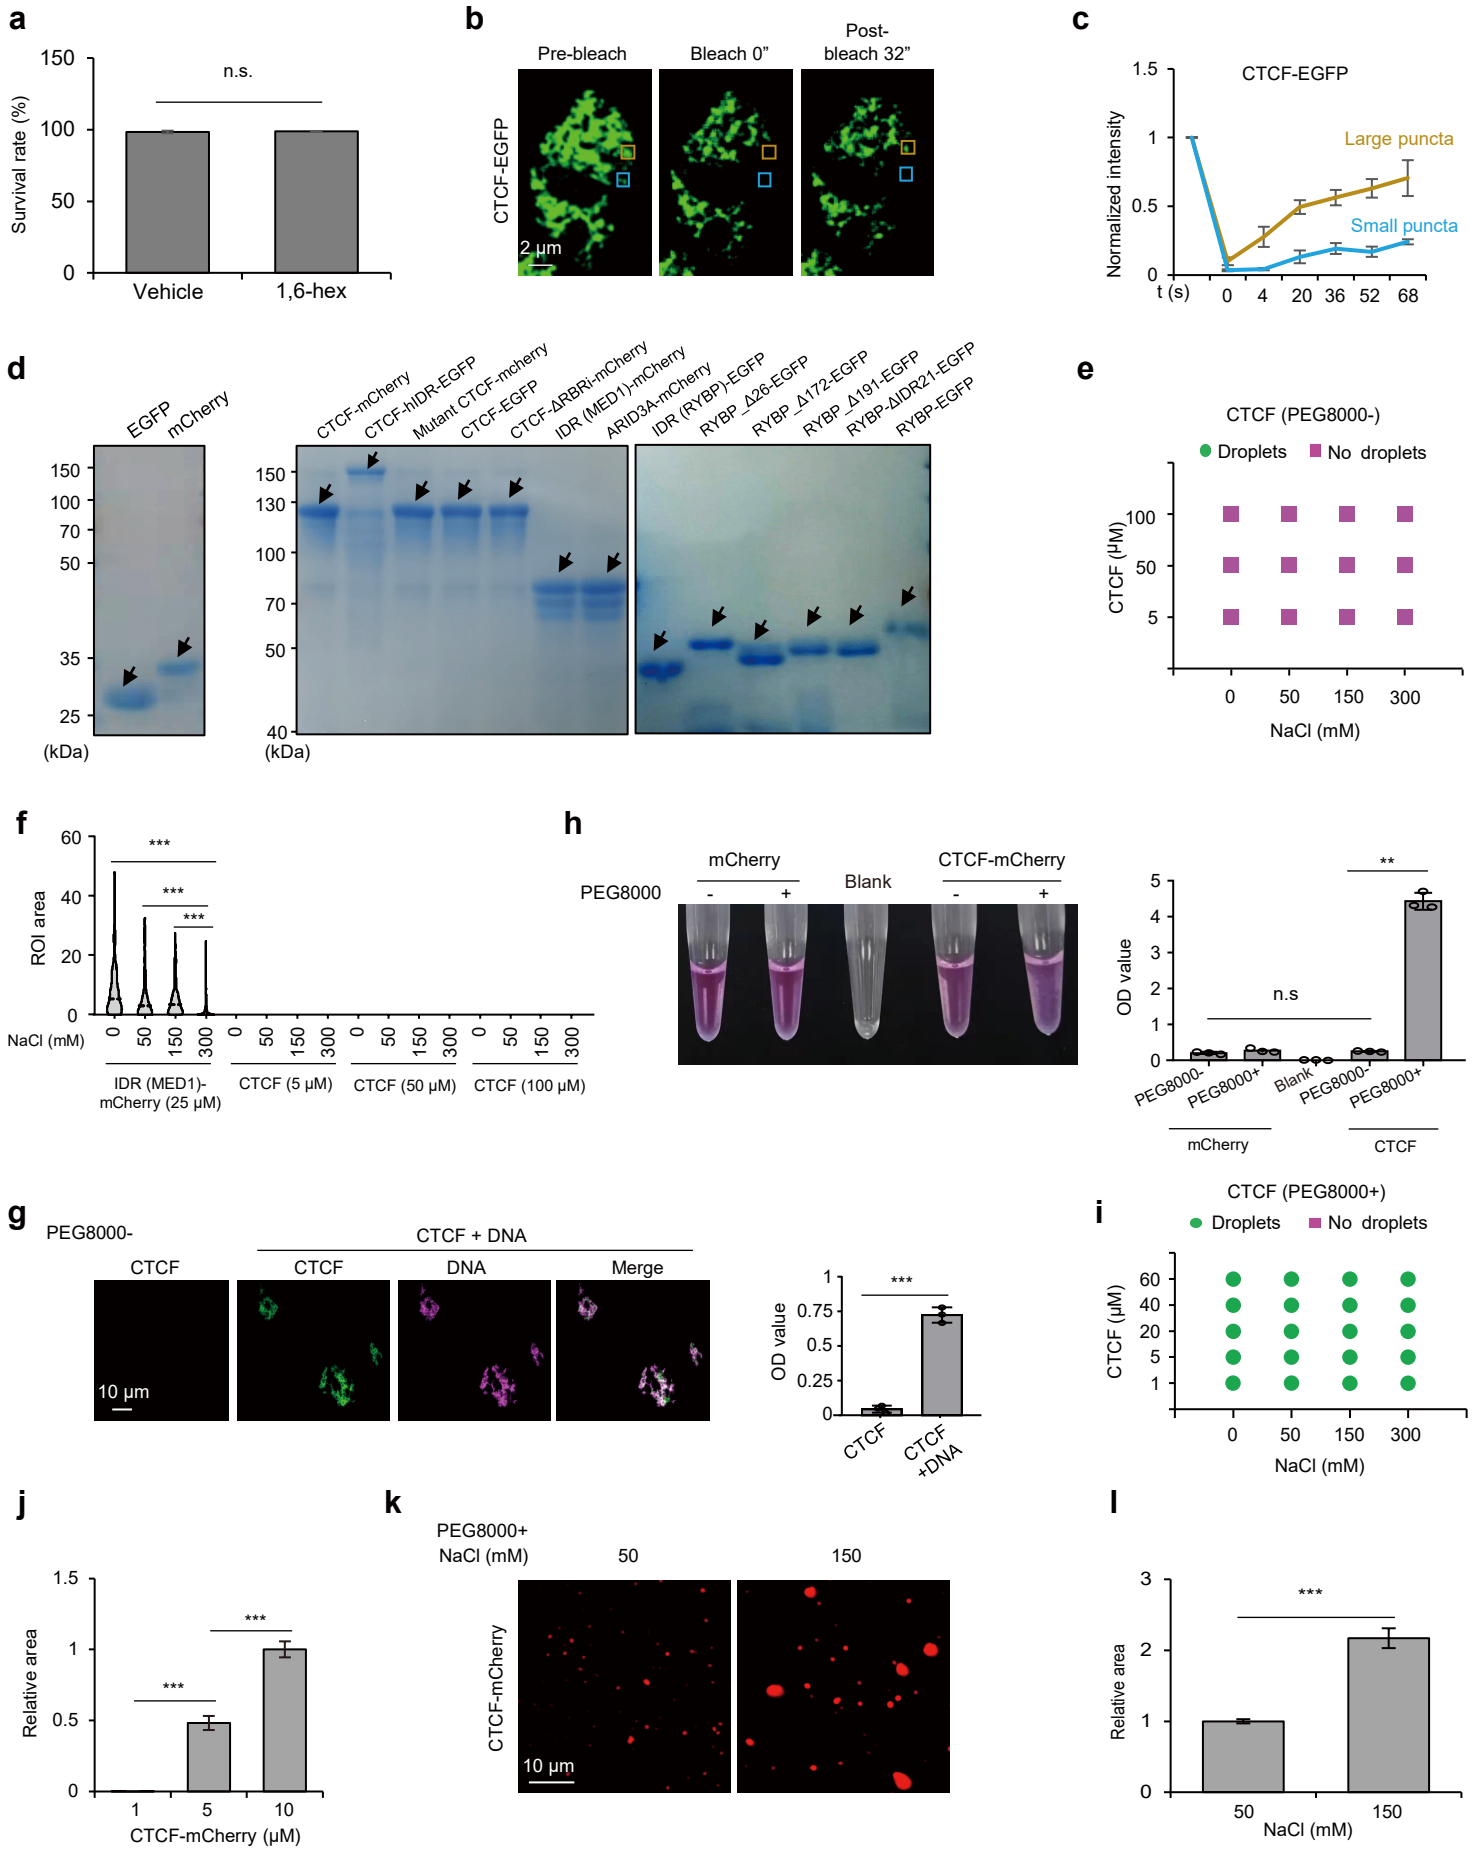

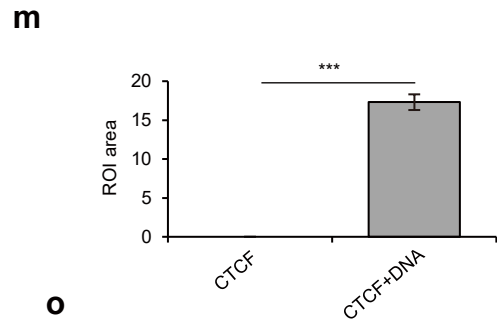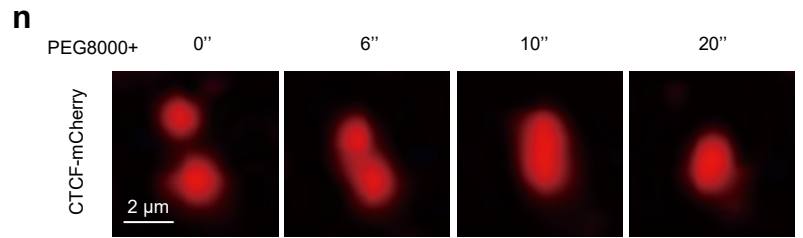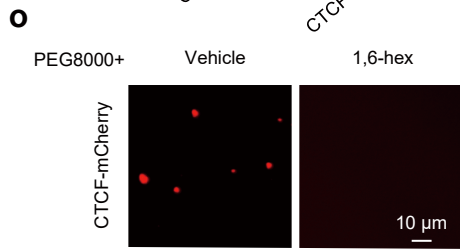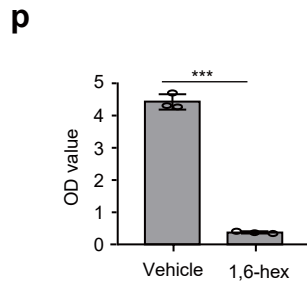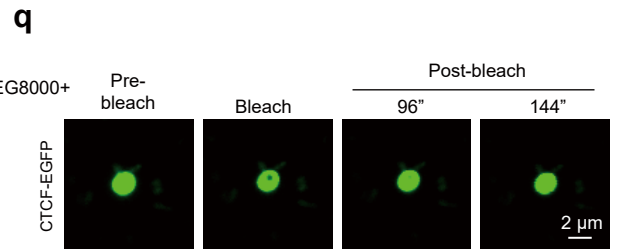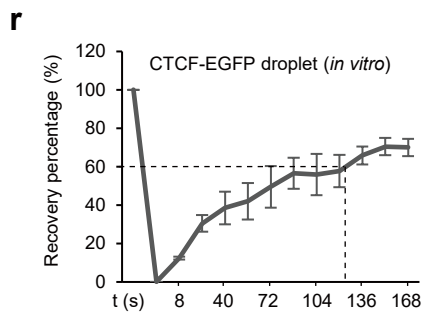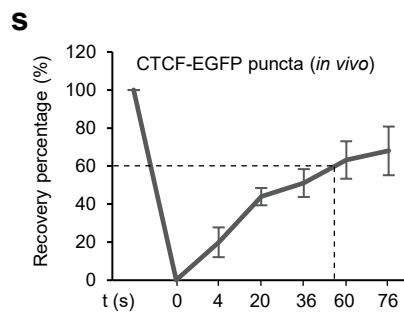

**Supplementary information, Fig. S2 CTCF exhibits phase separation behavior in the nucleus.** **a** The survival rate of mESCs before and after with 1,6-hex treatment. Welch's *t*-test; vehicle, *n* = 306; 1,6-hex, *n* = 680; *P* = 0.7235. **b, c** Representative images (**b**) and quantification (**c**) of FRAP in ESCs expressing exogenous CTCF-EGFP. The yellow boxes highlight the bleached large CTCF puncta, and cyan boxes highlight the bleached small CTCF puncta. Data are plotted as means  $\pm$  SEM (*n* = 3). **d** SDS-PAGE gel images showed the purity of recombinant proteins, black arrows denote the targeted proteins. **e** Phase diagrams showed CTCF droplet formation under different protein and salt ion concentrations without PEG8000. **f** ROI area of IDR (MED1) and CTCF at different protein and salt ion concentrations without PEG8000. Welch's *t*-test; *n* values of the IDR (MED1) are (from left to right): 102, 92, 200 and 168, other *n* values are 0. *P* values (from left to right): 2.2896e-11, 6.88e-7, 1.391e-13. **g** Without PEG8000, representative images (left) and turbidity assay (right) of CTCF-mCherry aggregation after addition of Cy5-labeled 25 $\times$ DNA motif (5 ng/ $\mu$ L). The concentration of CTCF-mCherry was 10  $\mu$ M. Welch's *t*-test; all *n* values are: *n* = 3; *P* = 0.0005. **h** Visualization (left) and quantitation (right) of turbidity associated with droplet formation across mCherry and CTCF-mCherry recombinant protein in the presence or absence of PEG8000, the protein concentration of both mCherry and CTCF-mCherry were 60  $\mu$ M. Welch's *t*-test; all *n* values are: *n* = 3; *P* values (from left to right): 0.1172 and 0.001031. **i** Phase diagrams showed CTCF droplet formation under different protein and salt ion concentrations with PEG8000. **j** Histogram showing the relative ROI area of droplets in the buffer with 1  $\mu$ M, 5  $\mu$ M and 10  $\mu$ M CTCF recombinant protein in the presence of PEG8000. Welch's *t*-test; 1  $\mu$ M CTCF, *n* = 37; 5  $\mu$ M CTCF, *n* = 162; 10  $\mu$ M CTCF, *n* = 1387; *P* values are (from left to right): *p*-value < 2.2e-16; *P* = 6.492e-12. **k, l** Representative images (**k**) and histogram (**l**) showed the droplet formation at different NaCl concentrations in the presence of 20% PEG8000, the protein concentration of CTCF-mCherry was 4  $\mu$ M. Welch's *t*-test; 50 mM NaCl, *n*

= 997; 150 mM NaCl,  $n = 762$ ;  $P = 7.284e-16$ . **m** ROI area of CTCF-mCherry aggregation after addition of Cy5-labeled 25×DNA motif (5 ng/μL). The concentration of CTCF-mCherry was 0.8 μM, 20% PEG8000 were added. Welch's *t*-test;  $n$  values are (from left to right):  $n = 0$ ;  $n = 187$ ;  $P < 2.2e-16$ . **n** Droplet fusion behavior of CTCF-mCherry recombinant protein (4 μM) in the presence of PEG8000. **o, p** Representative images (**o**) and turbidity assay (**p**) of CTCF-mCherry (4 μM) formed droplets before and after treatment with 10% 1,6-hex in the presence of PEG8000, Welch's *t*-test,  $n = 997$ ,  $P = 0.0009217$ . **q, r** Representative images (**q**) and quantification (**r**) of FRAP data for CTCF-EGFP droplets *in vitro*, the concentration of CTCF-mCherry was 5 μM. **s** Quantification of FRAP data for CTCF-EGFP puncta *in vivo*.
