# Supplementary material
Source: PubMed Central journal article supplement (PMC9343660)
Supplement: 41422_2022_676_MOESM6_ESM.pdf [file 41422_2022_676_MOESM6_ESM.pdf]

# Supplementary information, Fig.S6

**a**

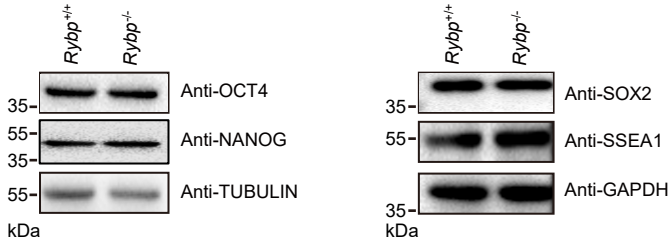

**b**

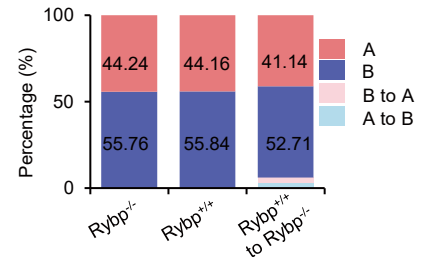

**c**

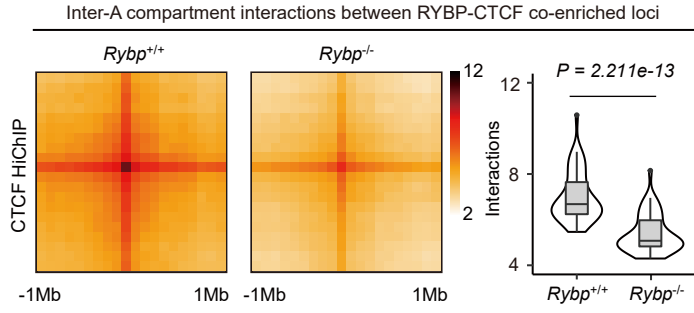

**d**

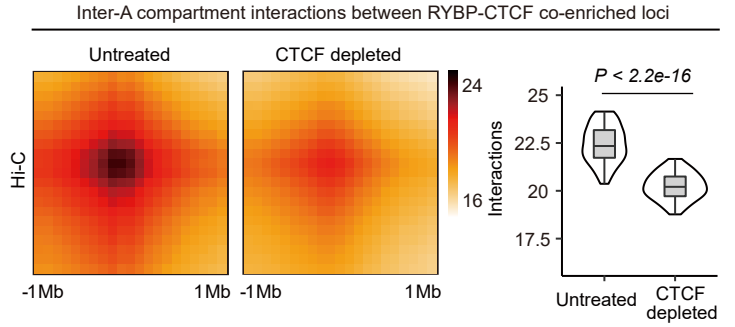

**e**

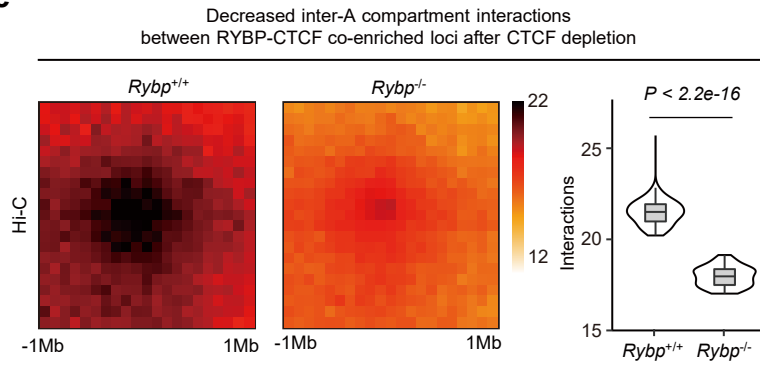

**f**

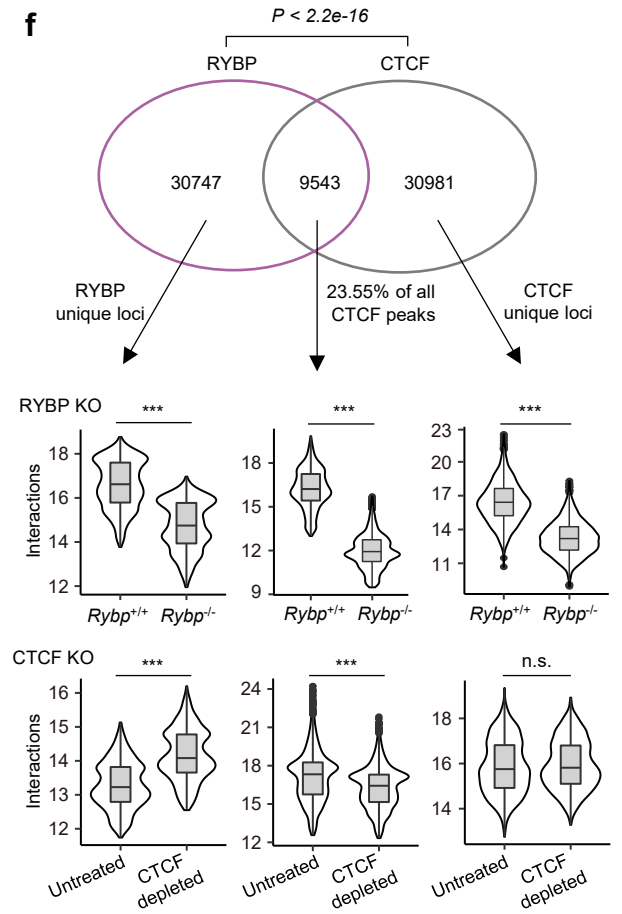

**g**

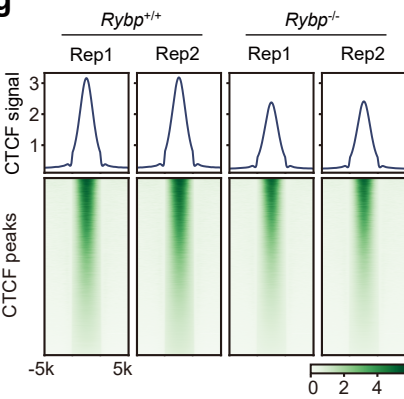

**h**

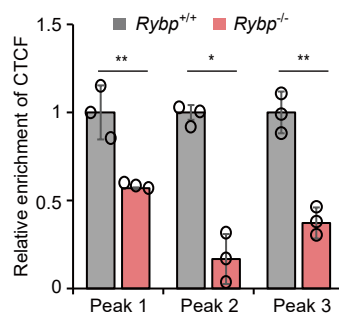

**Supplementary information, Fig. S6 RYBP depletion attenuates CTCF-connected inter-A compartment interactions.** **a** Western blot showing the expression level of OCT4, NANOG, SOX2 and SSEA1 after inducing RYBP depletion for 2 days. **b** Hi-C data showing the percentages of compartment switching between *Rybp*<sup>-/-</sup> and *Rybp*<sup>+/+</sup> mESCs. **c** APA plots (left) and quantitation (right) showing the genome-wide aggregate strength between RYBP-CTCF co-enriched loci from different A compartments after RYBP depletion (CTCF HiChIP data), Wilcoxon rank-sum test. **d** APA plots (left) and quantitation (right) showing the genome-wide aggregate strength between RYBP-CTCF co-enriched loci from different A compartments after CTCF depletion (Hi-C data), Wilcoxon rank-sum test. **e** APA plots (left) and quantitation (right) showing the genome-wide aggregate strength of inter-A compartment interactions between RYBP-CTCF co-enriched loci after RYBP depletion (Hi-C data), the most strongly decreased (top 10%) inter-A compartment interactions between RYBP-CTCF co-enriched loci after CTCF depletion were used for the analysis, Wilcoxon rank-sum test. **f** Top: the overlap between RYBP (GSM4052120) and CTCF (GSE29218) peaks, permutation test. Middle and bottom: Hi-C data showing the interaction alteration between RYBP unique loci, between RYBP-CTCF co-binding loci or between CTCF unique loci after RYBP (middle) or CTCF (bottom) depletion, Wilcoxon rank-sum test; all p values were  $P < 2.2e-16$  except the last one (bottom right) with the  $P = 0.998$ . **g** ChIP-seq showing the CTCF signal at CTCF center of *Rybp*<sup>+/+</sup> ESCs. **h** ChIP-qPCR showing the reduced enrichment of CTCF at these CTCF deposited loci after RYBP depletion. Welch's *t*-test; P values are (from left to right):  $P = 0.0028$ ;  $P = 0.025$ ;  $P = 0.0066$ ,  $n = 3$ .
