# Supplementary material
Source: PubMed Central journal article supplement (PMC9343660)
Supplement: 41422_2022_676_MOESM7_ESM.pdf [file 41422_2022_676_MOESM7_ESM.pdf]

# Supplemental Information, Fig.S7

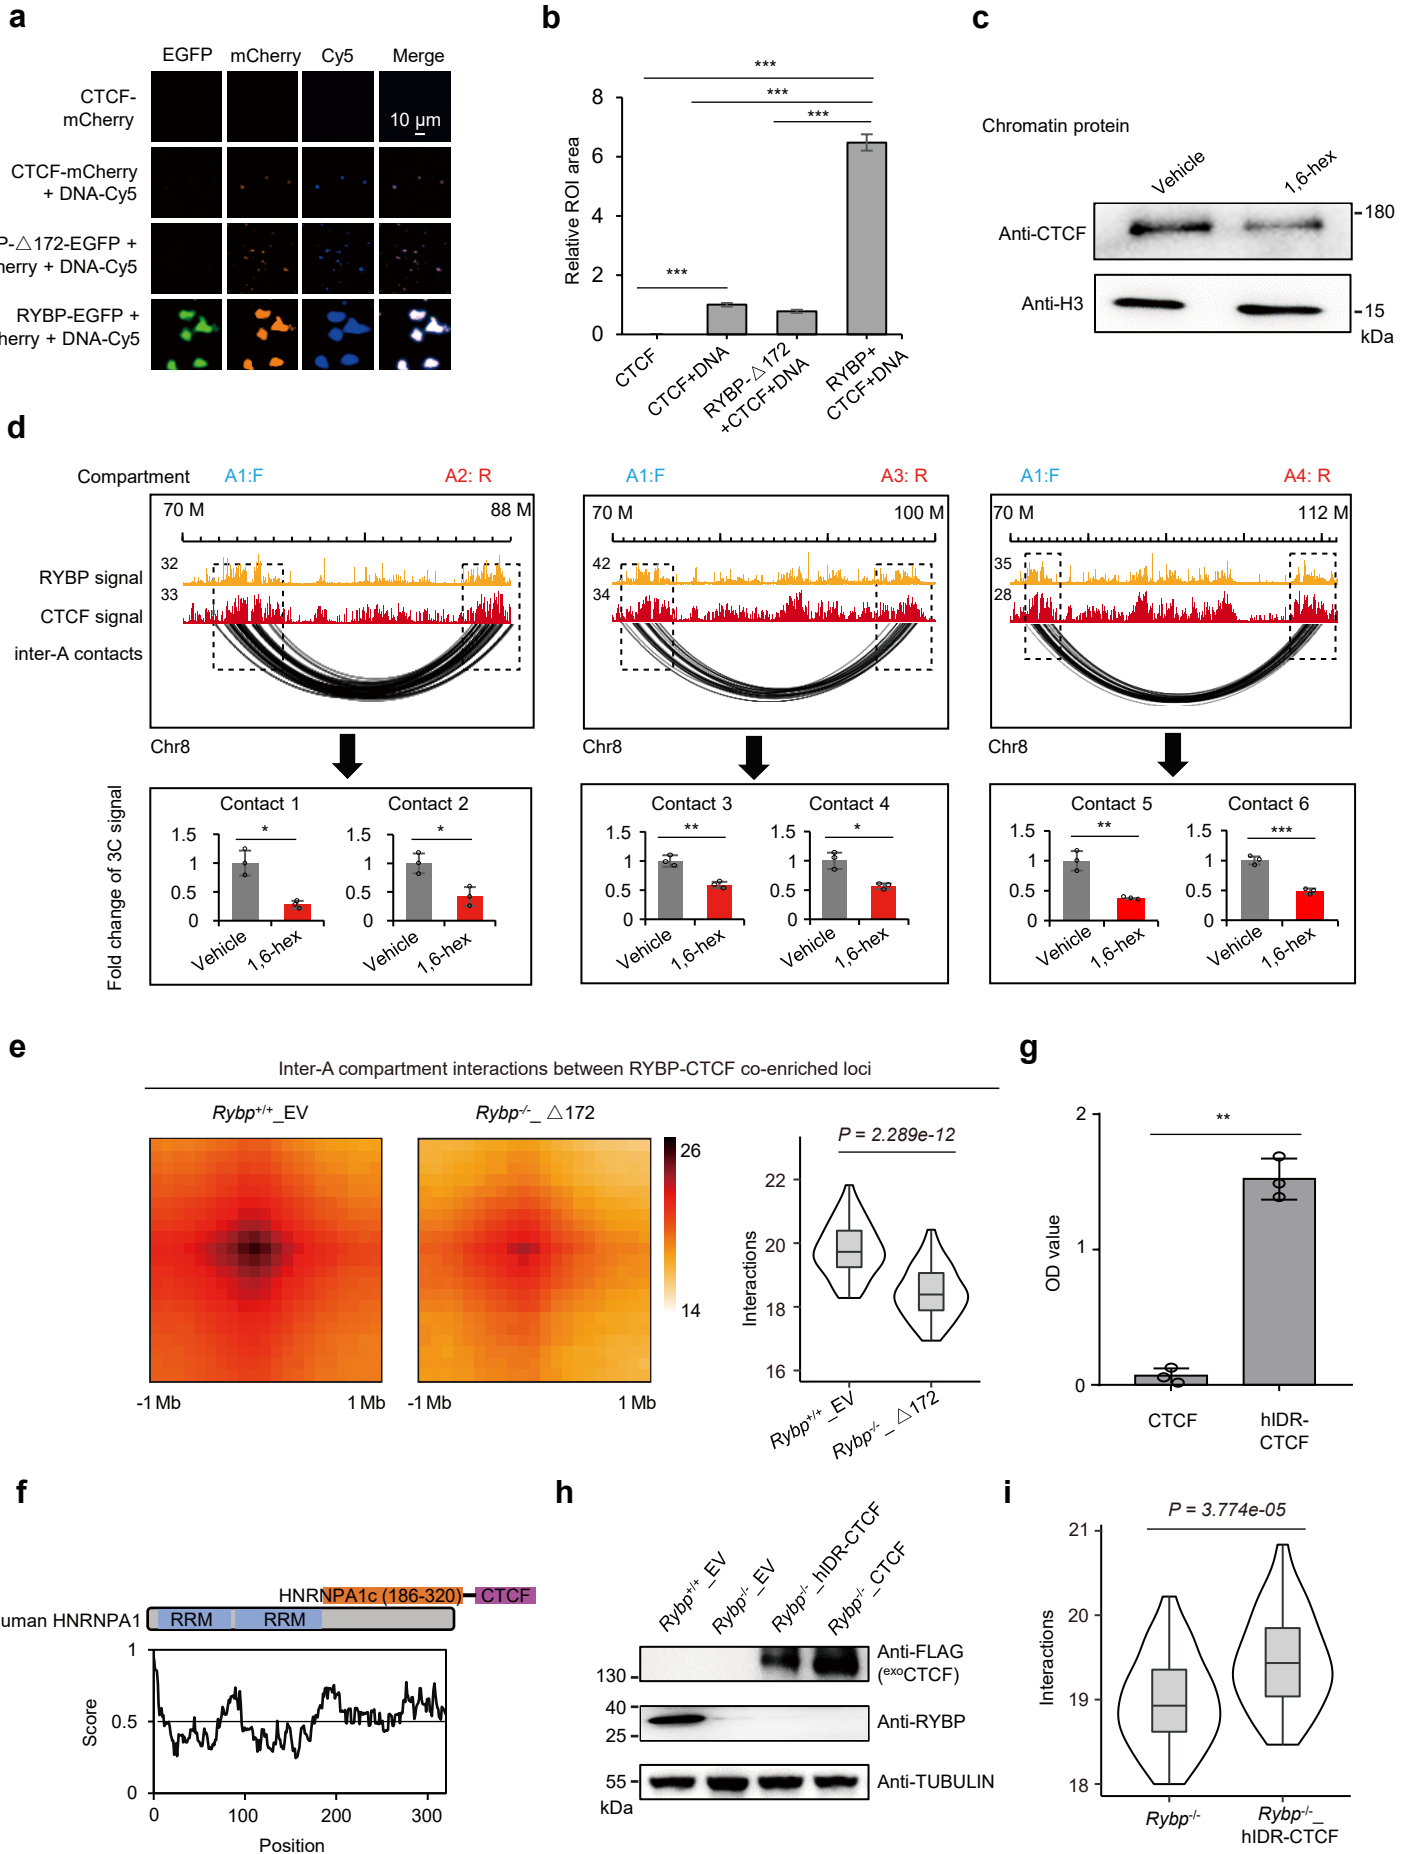

**j** Decreased inter-A compartment interactions  
between RYBP-CTCF co-enriched loci after RYBP depletion

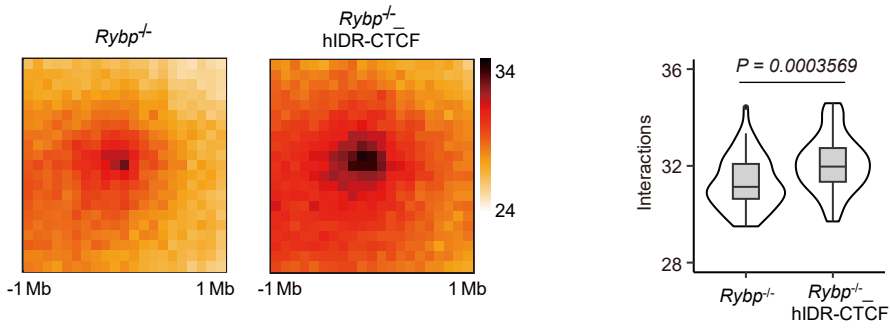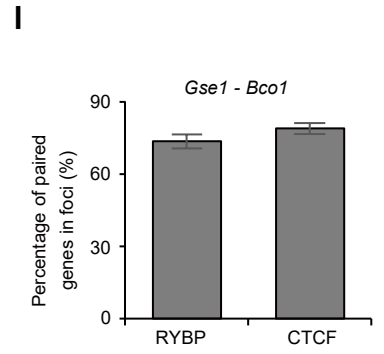

**k** Inter-A compartment interactions between RYBP-CTCF co-enriched loci

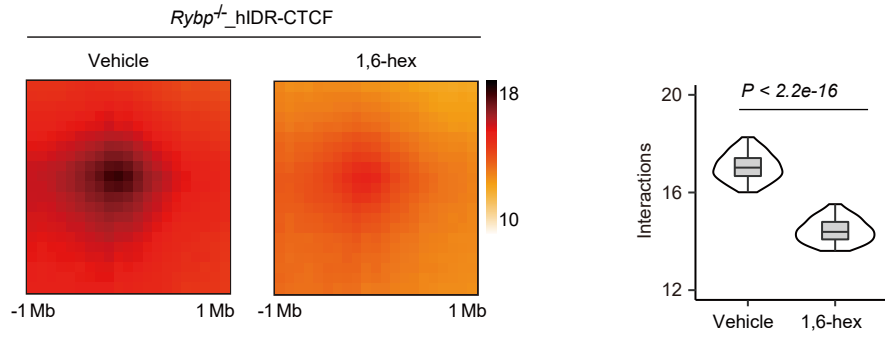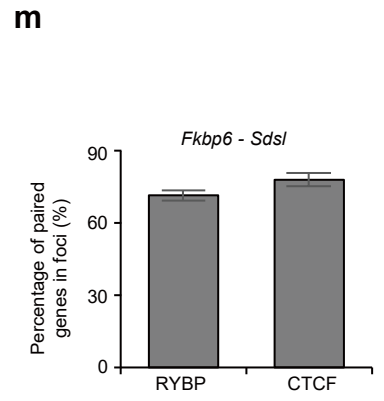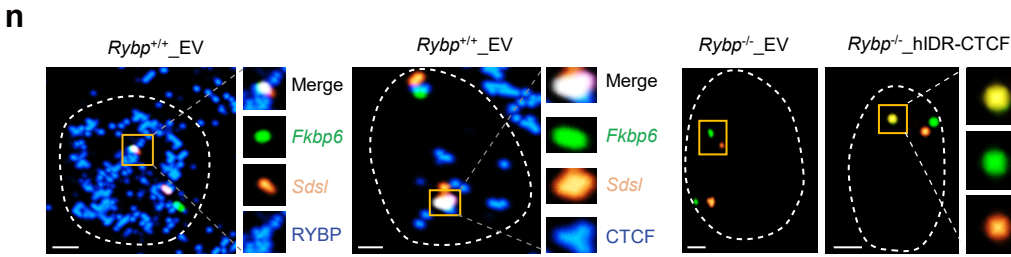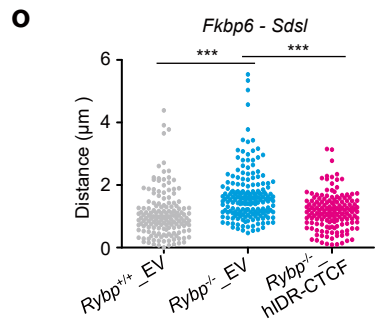

**Supplementary information, Fig.S7 Induced CTCF phase separation restores inter-A compartment interactions impaired by RYBP depletion. a, b** In the presence of PEG8000, representative images (**a**) and statics (**b**) of CTCF-mCherry aggregation after addition of Cy5-labeled 25×DNA motif, RYBP- $\Delta$ 172-EGFP or full-length RYBP-EGFP. The concentration of RYBP-EGFP and RYBP- $\Delta$ 172-EGFP were 40  $\mu$ M, CTCF-mCherry was 0.8  $\mu$ M. Welch's *t*-test; n values are (from left to right): n = 0; n = 187; n = 127; n = 196. All the P values are (from left to right):  $P < 2.2e-16$ . **c** Western blot showing the reduced binding of CTCF at chromatin after 1,6-hex treatment. **d** Top: The zoom-in browser view of interactions between two A compartments from CTCF ChIA-PET data (GSM2645441). Bottom: 3C-qPCR showing the decreased interactions between the two A compartments after 1,6-hex treatment. Welch's *t*-test; P values are (from left to right):  $P = 0.0235$ ;  $P = 0.0379$ ;  $P = 0.0016$ ;  $P = 0.01088$ ;  $P = 0.0016$ ;  $P = 0.0002$ , n = 3. **e** APA plots (left) and quantitation (right) showing the genome-wide aggregate strength between RYBP-CTCF co-enriched loci from different A compartments after RYBP mutation, Wilcoxon rank-sum test. **f** Human HNRNPA1 (left) is intrinsically disordered protein predicted by IUPred2A. The C-term IDR (186-320, yellow frame) of HNRNPA1 was fused with full-length CTCF. The human HNRNPA1 shows low homology with mouse HNRNPA1. **g** Turbidity assay showing the droplet formation of WT or hIDR-CTCF without PEG8000, 10  $\mu$ M WT or hIDR-CTCF were used. Welch's *t*-test; all n values are 3;  $P = 0.001446$ . **h** Western blot showing the expression of exogenous hIDR-CTCF and exogenous CTCF (<sup>exo</sup>CTCF) in ESCs. **i** Quantitation of APA showing the genome-wide aggregate strength between RYBP-CTCF co-enriched loci from different A compartments after inducing CTCF phase separation, Wilcoxon rank-sum test. **j** APA plots (left) and quantitation (right) showing the genome-wide aggregate strength between RYBP-CTCF co-enriched loci after inducing CTCF phase separation, the most strongly decreased (top 10%) inter-A compartment interactions between RYBP-CTCF co-enriched loci after RYBP depletion were

used for the analysis, Wilcoxon rank-sum test. **k** APA plots (left) and quantitation (right) showing the genome-wide aggregate strength between RYBP-CTCF co-enriched loci from different A compartments after 1,6-hex treatment in *Rybp*<sup>-/-</sup>\_hIDR-CTCF mESCs, Wilcoxon rank-sum test. **l**, **m** The percentage of interacted genes in RYBP or CTCF puncta. **n** DNA FISH coupled with RYBP or CTCF immunofluorescence displaying the *Fkbp6* (green) and *Sds1* (yellow) are interacted in RYBP or CTCF puncta, and distance change in *Rybp*<sup>-/-</sup>\_EV mESCs and *Rybp*<sup>-/-</sup>\_hIDR-CTCF mESCs, the two genes localized in RYBP-CTCF co-enriched loci, all the scale bars denote 2 μm. **o** The distance change between *Fkbp6* and *Sds1* in different cell lines. Welch's *t*-test; *Rybp*<sup>+/+</sup>\_EV: n = 181; *Rybp*<sup>-/-</sup>\_EV: n = 182; *Rybp*<sup>-/-</sup>\_hIDR-CTCF: n = 167; P values are (from left to right): *P* = 1.0549e-10; *P* = 2.112e-10.
