# Supplementary material
Source: PubMed Central journal article supplement (PMC9343660)
Supplement: 41422_2022_676_MOESM9_ESM.pdf [file 41422_2022_676_MOESM9_ESM.pdf]

# Supplementary information, Fig.S9

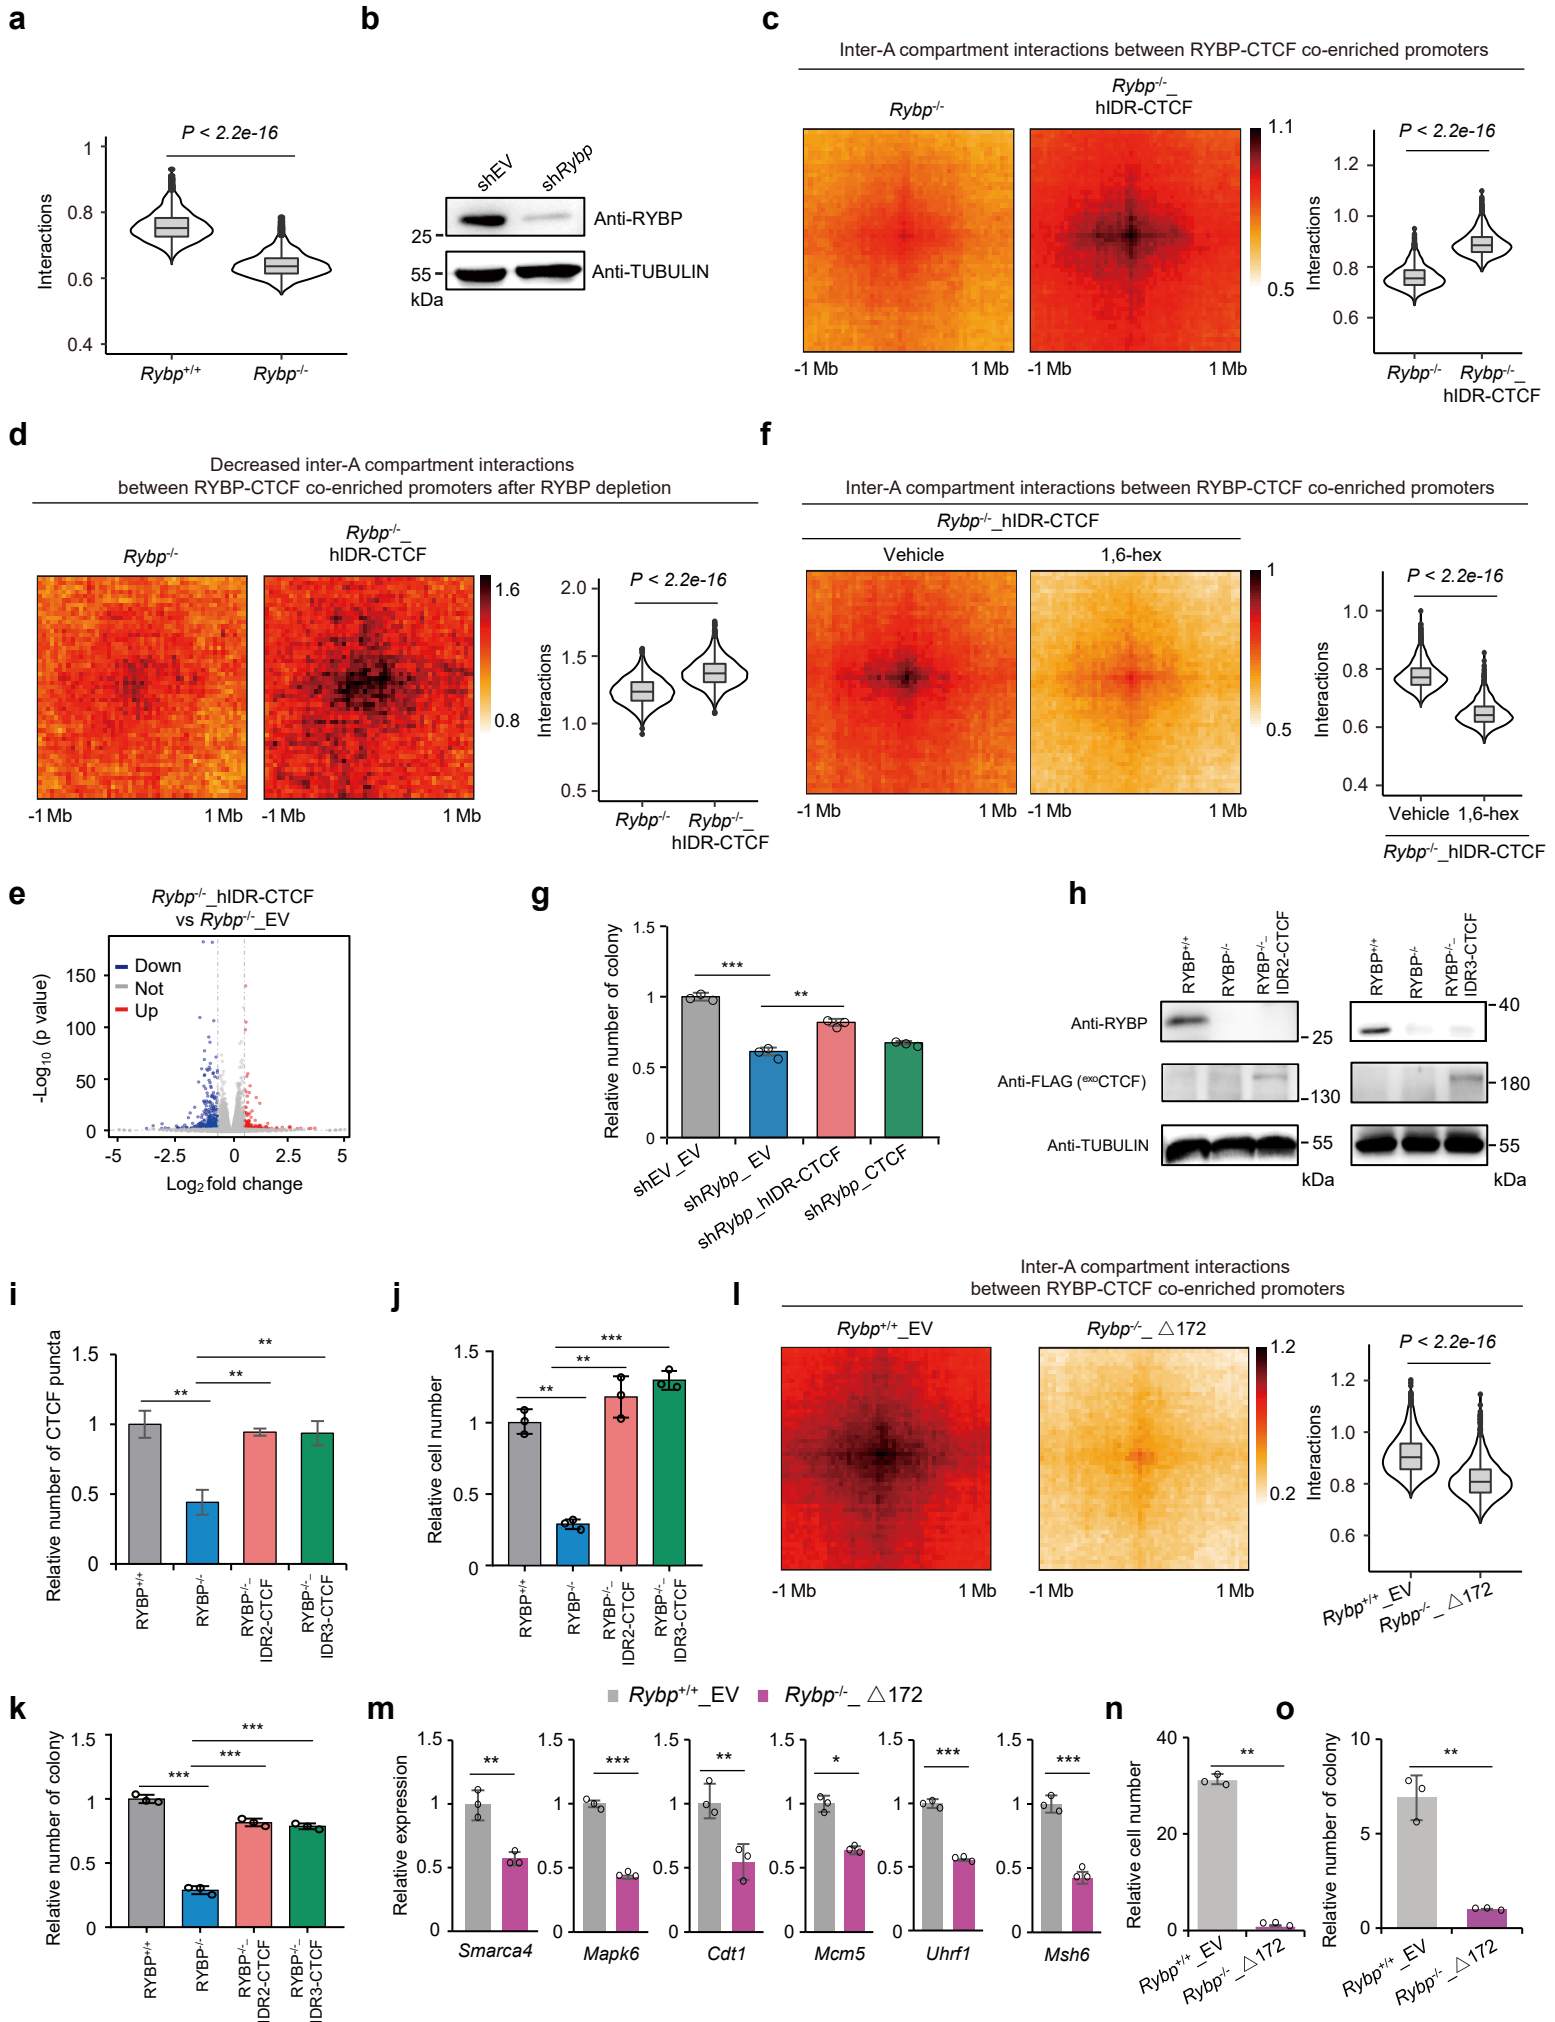

**Supplementary information, Fig.S9 Induced CTCF phase separation improves self-renewal of ESCs.** **a** Quantitation of APA showing the genome-wide aggregate strength between RYBP-CTCF co-enriched promoters from different A compartments after RYBP depletion, Wilcoxon rank-sum test. **b** Western blot showing the successful knockdown of RYBP via shRNA for 96h. **c** APA plots (left) and quantitation (right) showing the genome-wide aggregate strength between RYBP-CTCF co-enriched promoters from different A compartments after inducing CTCF phase separation. **d** APA plots (left) and quantitation (right) showing the genome-wide aggregate strength between RYBP-CTCF co-enriched promoters after inducing CTCF phase separation, the most strongly decreased inter-A compartment interactions (top 10%) between RYBP-CTCF co-enriched promoters after RYBP depletion were used for the analysis. **e** Volcano plot showing the expression change of genes after exogenously expressing hIDR-CTCF in *Rybp*<sup>-/-</sup> mESCs. **f** APA plots (left) and quantitation (right) showing the genome-wide aggregate strength between RYBP-CTCF co-enriched promoters from different A compartments after 1,6-hex treatment in *Rybp*<sup>-/-</sup> hIDR-CTCF mESCs, Wilcoxon rank-sum test. **g** Relative number of newly formed ESC colonies in each group. P values are (from left to right):  $P = 0.0006$ ;  $P = 0.0053$ ;  $n = 3$ , Welch's *t*-test. **h** Western blot showing the successful expression of exogenous RYBP IDR-fused CTCF (*Rybp*<sup>-/-</sup>-IDR2-CTCF) and FUS IDR-fused CTCF (*Rybp*<sup>-/-</sup>-IDR3-CTCF) in RYBP-depleted ESCs. **i** Relative number of highly concentrated CTCF puncta in different cell lines. n values are (from left to right): 50, 66, 64 and 54 cells; P values are (from left to right): 0.004907, 0.006181 and 0.005171. **j** Relative number of cells for different cell lines after re-seeding with same number of cells for 5 days. All n values are 3; P values are (from left to right): 0.002417, 0.00628 and 0.0001622; **k** Relative number of colonies in different cell lines. All n values are 3; P values are (from left to right): 1.12e-05, 3.09e-05 and 5.22e-05; **l** APA plots (left) and quantitation (right) showing the genome-wide aggregate strength between RYBP-CTCF co-enriched promoters from

different A compartments after RYBP mutation, Wilcoxon rank-sum test. **m** RT-qPCR showing the expression alteration of self-renewal associated genes before and after RYBP mutation. P values are (from left to right):  $P = 0.0055$ ;  $P = 0.0004$ ;  $P = 0.0077$ ;  $P = 0.0251$ ;  $P = 0.00074$ ;  $P = 0.00026$ ,  $n = 3$ , Welch's  $t$ -test. **n**, **o** Relative number of cells (**n**) and newly formed ESC colonies (**o**) in  $Rybp^{+/+}$ \_EV and  $Rybp^{-/-}$ \_Δ172 groups. P values are (from left to right):  $P = 0.001$ ;  $P = 0.003$ ,  $n = 3$ , Welch's  $t$ -test. *n.s.*, *not significant*,  $P > 0.05$ ;  $**P < 0.01$ ;  $***P < 0.001$ . qPCR data show means  $\pm$  SD.
