# Supplementary material
Source: PubMed Central journal article supplement (PMC9343660)
Supplement: 41422_2022_676_MOESM12_ESM.pdf [file 41422_2022_676_MOESM12_ESM.pdf]

Supplementary information, Fig.S12

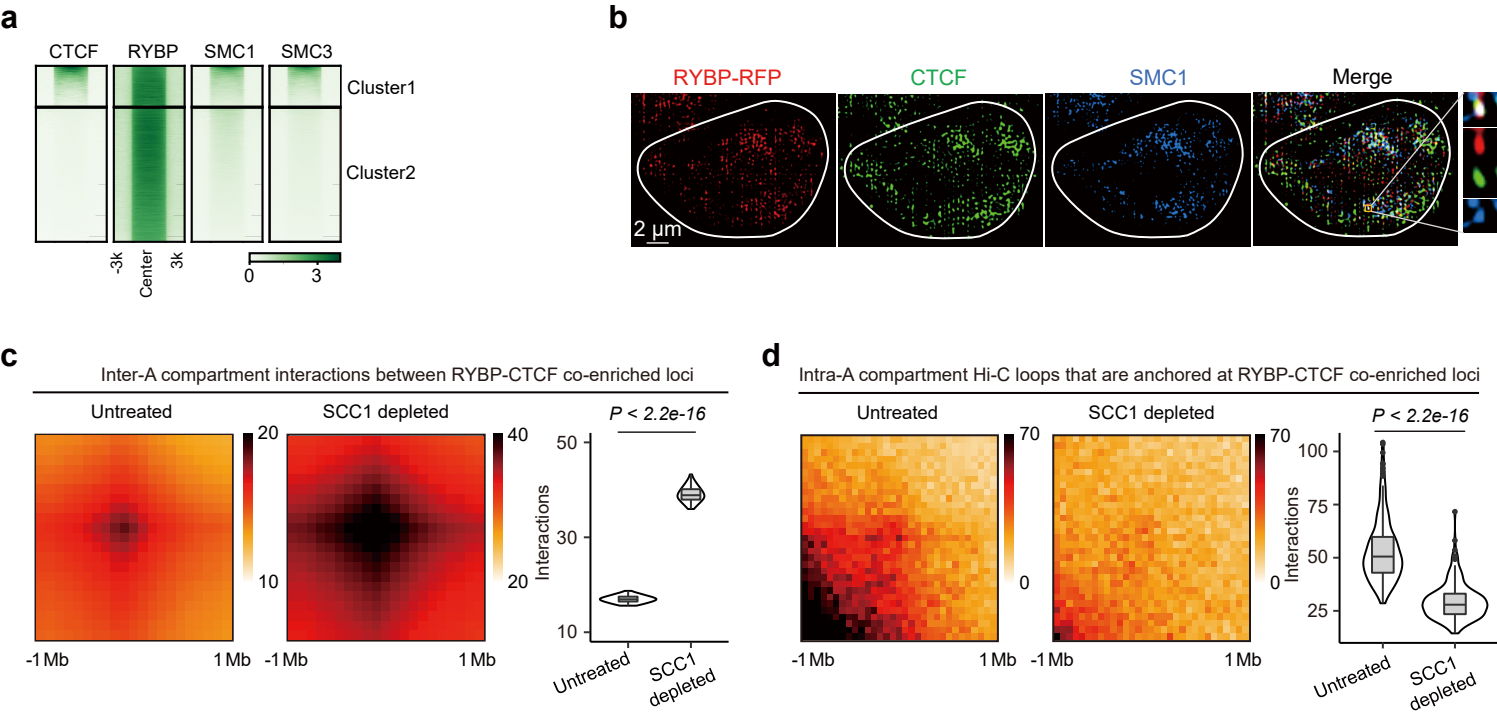

**Supplemental information, Figure S12 The role of cohesin in RYBP-CTCF phase separation.**

**a** ChIP-seq showing the distribution of CTCF (GSE29218), SMC1 (GSM560342) and SMC3 (GSM560343) at RYBP peaks (GSM4052120). **b** Representative immunofluorescence images showing the co-localization across RYBP, CTCF and SMC1. **c** Aggregate peak analysis (APA) plots (left) and quantitation (right) showing the genome-wide aggregate of strength between RYBP-CTCF co-enriched loci from different A compartments after SCC1 depletion (Hi-C data), Wilcoxon rank-sum test. **d** Aggregate peak analysis (APA) plots (left) showing the genome-wide aggregate of Hi-C loops (within A compartments) which are anchored at RYBP-CTCF co-enriched loci after cohesin depletion (Hi-C data), the boxplot quantified the aggregate of interactions at the bottom left corner of the heatmap, Wilcoxon rank-sum test.
