# Supplementary material
Source: PubMed Central journal article supplement (PMC9343660)
Supplement: 41422_2022_676_MOESM13_ESM.pdf [file 41422_2022_676_MOESM13_ESM.pdf]

**Table S1. IDR analysis of CTCF partners**

| Description | IDR percentage (%) |
|-------------|--------------------|
| RYBP        | 88.1578947         |
| BBC3        | 85.49222798        |
| LLPH        | 83.84615385        |
| CD3EAP      | 81.20300752        |
| YAF2        | 79.7752809         |
| CBX4        | 77.45454545        |
| CBX2        | 77.17601547        |
| YY1         | 71.9806763         |
| EBNA1BP2    | 70.58823529        |
| PHC1        | 69.6039604         |
| PHC3        | 69.2500175         |
| CBX6        | 68.28087167        |
| CBX7        | 61.78343949        |
| CBX8        | 59.72222222        |
| PHC2        | 58.75748193        |
| NOP2        | 58.74384236        |
| RING1A      | 57.67326733        |
| ATRX        | 57.26979           |
| HNRNPU      | 53.875             |
| UBTF        | 53.3908353         |
| JARID2      | 48.3792545         |
| FXR1        | 46.97193501        |
| RSL1D1      | 43.5840708         |
| KDM2B       | 43.2061344         |
| ZBTB33      | 42.6229508         |
| PCL1        | 41.87279           |
| RING1B      | 40.89552           |
| AEBP2       | 38.81469           |
| PCGF2       | 38.41642           |
| PCGF6       | 37.5               |
| PCGF4       | 37.4613            |
| EZH2        | 30.87248           |
| PCL2        | 29.89865           |
| SUZ12       | 21.32254           |
| RBBP4       | 20.37471           |
| EZH1        | 18.25503           |
| PCL3        | 16.46447           |
| RBBP7       | 15.80189           |
| EED         | 15.45455           |
| POLR1E      | 13.74696           |
| PCGF3       | 11.71548           |
| PCGF5       | 10.98039           |
| POLR1A      | 10.65812           |
| FANCD2      | 10.48276           |
| DDX21       | 9.069494           |
| WDR5        | 8.433735           |
| ZMYM1       | 3.463687           |
| POLR1B      | 2.026432           |
| FAU         | 0                  |
| PCGF1       | 0                  |
