# Supplementary material
Source: PubMed Central journal article supplement (PMC9343660)
Supplement: 41422_2022_676_MOESM14_ESM.pdf [file 41422_2022_676_MOESM14_ESM.pdf]

**Table S2. Information of recombinant DNA**

| Recombinant DNA                        | corresponding protein or cell line in manuscript                             | Details                                                                                                                                                                                                                                                       |
|----------------------------------------|------------------------------------------------------------------------------|---------------------------------------------------------------------------------------------------------------------------------------------------------------------------------------------------------------------------------------------------------------|
| pET28a-CTCF-mCherry                    | Protein: CTCF-mCherry                                                        | Vector backbone: pET28a-mcherry (modified from addgene 61607);<br>Inserted CDS: full-length mouse CTCF fused mCherry                                                                                                                                          |
| pET28a-CTCF-EGFP                       | Protein: CTCF-EGFP                                                           | Vector backbone: pET28a-EGFP (modified from addgene 61607);<br>Inserted CDS: full-length mouse CTCF fused EGFP                                                                                                                                                |
| pET28a- IDR (MED1)-mCherry             | Protein: IDR (MED1)-mCherry                                                  | Vector backbone: pET28a-mcherry (modified from addgene 61607);<br>Inserted CDS: C-terminal of mouse MED1 (948-1574) fused mCherry                                                                                                                             |
| pET28a-RYBP-EGFP                       | Protein: RYBP-EGFP                                                           | Vector backbone: pET28a-EGFP (modified from addgene 61603);<br>Inserted CDS: full-length mouse RYBP fused EGFP                                                                                                                                                |
| pET28a-IDR (RYBP)-EGFP                 | Protein: IDR (RYBP)-EGFP                                                     | Vector backbone: pET28a-EGFP (modified from addgene 61603);<br>Inserted CDS: C-terminal of mouse RYBP (51-228) fused EGFP                                                                                                                                     |
| pET28a-mutant CTCF-mCherry             | Protein: Mutant CTCF                                                         | Vector backbone: pET28a-mcherry (modified from addgene 61607);<br>Inserted CDS: mutant mouse RYBP (deletion of 18 amino acid residues in CTCF, including 96-101aa, 86-88aa, 164-169aa, 268aa, 271aa, 296aa, 324aa, 409aa, 557aa) fused mCherry                |
| pET28a-hIDR-CTCF-EGFP                  | Protein: hIDR-CTCF                                                           | Vector backbone: pET28a-EGFP (modified from addgene 61603);<br>Inserted CDS: C-terminal of human HNRNPA1 (186-320) fused CTCF and EGFP                                                                                                                        |
| pET28a-ARID3A-mCherry                  | Protein: ARID3A-mCherry                                                      | Vector backbone: pET28a-mcherry (modified from addgene 61607);<br>Inserted CDS: full-length mouse ARID3A fused mCherry                                                                                                                                        |
| pET28a-EGFP                            | Protein: EGFP                                                                | Vector backbone: pET28a-EGFP (modified from addgene 61603);<br>empty vector                                                                                                                                                                                   |
| pET28a-mCherry                         | Protein: mCherry                                                             | Vector backbone: pET28a-mcherry (modified from addgene 61607);<br>empty vector                                                                                                                                                                                |
| pET28a-RYBP- $\Delta$ 172-EGFP         | Protein: RYBP- $\Delta$ 172-EGFP                                             | Vector backbone: pET28a-EGFP (modified from addgene 61603);<br>Inserted CDS: mutant mouse RYBP (deletion of 172-191 amino acid residues) fused EGFP                                                                                                           |
| pET28a-RYBP- $\Delta$ 192-EGFP         | Protein: RYBP- $\Delta$ 192-EGFP                                             | Vector backbone: pET28a-EGFP (modified from addgene 61603);<br>Inserted CDS: mutant mouse RYBP (deletion of 192-211 amino acid residues) fused EGFP                                                                                                           |
| pET28a-RYBP- $\Delta$ 26-EGFP          | Protein: RYBP- $\Delta$ 26-EGFP                                              | Vector backbone: pET28a-EGFP (modified from addgene 61603);<br>Inserted CDS: mutant mouse RYBP (deletion of 26-45 amino acid residues) fused EGFP                                                                                                             |
| pET28a-RYBP- $\Delta$ IDR21-EGFP       | Protein: RYBP- $\Delta$ IDR21-EGFP                                           | Vector backbone: pET28a-EGFP (modified from addgene 61603);<br>Inserted CDS: mutant mouse RYBP (deletion of 21 amino acid residues in RYBP IDR, including 75-77aa, 86-88aa, 107-109aa, 153-155aa, 165-167aa, 183-185aa, 215-217aa) fused EGFP                 |
| pTripz-RYBP                            | Cell line: RYBP OE                                                           | Vector backbone: pLentiCRISPR-EGFP (modified from addgene 71307);<br>Inserted CDS: full-length mouse RYBP                                                                                                                                                     |
| piggyBac-FLAG-EV                       | Cell line: <i>Rybp</i> <sup>+/+</sup> _EV,<br><i>Rybp</i> <sup>-/-</sup> _EV | Vector backbone: pPB-CAG-3xFLAG-empty-pgk-hph (addgene 48754);<br>empty vector                                                                                                                                                                                |
| piggyBac- FLAG-CTCF                    | Cell line: CTCF OE                                                           | Vector backbone: pPB-CAG-3xFLAG-empty-pgk-hph (modified from addgene 48754);<br>Inserted CDS: full-length mouse CTCF                                                                                                                                          |
| piggyBac-FLAG-RYBP                     | Cell line: <sup>FLAG</sup> RYBP                                              | Vector backbone: pPB-CAG-3xFLAG-empty-pgk-hph (modified from addgene 48754);<br>Inserted CDS: full-length mouse RYBP                                                                                                                                          |
| piggyBac-FLAG-(RYBP- $\Delta$ 172)     | Cell line: <i>Rybp</i> <sup>+/+</sup> _ $\Delta$ 172                         | Vector backbone: pPB-CAG-3xFLAG-empty-pgk-hph (modified from addgene 48754);<br>Inserted CDS: mutant mouse RYBP (deletion of 172-191 amino acid residues) fused EGFP                                                                                          |
| piggyBac-hIDR-CTCF                     | Cell line: <i>Rybp</i> <sup>-/-</sup> _hIDR-CTCF                             | Vector backbone: pPB-CAG-3xFLAG-empty-pgk-hph (modified from addgene 48754);<br>Inserted CDS: C-terminal of human HNRNPA1 (186-320) fused CTCF                                                                                                                |
| piggyBac-IDR (RYBP)-CTCF               | Cell line: <i>Rybp</i> <sup>-/-</sup> _IDR2-CTCF                             | Vector backbone: pPB-CAG-3xFLAG-empty-pgk-hph (modified from addgene 48754);<br>Inserted CDS: C-terminal of RYBP (51-228) fused CTCF                                                                                                                          |
| piggyBac-IDR (FUS)-CTCF                | Cell line: <i>Rybp</i> <sup>-/-</sup> _IDR3-CTCF                             | Vector backbone: pPB-CAG-3xFLAG-empty-pgk-hph (modified from addgene 48754);<br>Inserted CDS: N-terminal of human FUS IDR (1-214) fused CTCF                                                                                                                  |
| piggyBac-RYBP-RFP                      | Cell line: RYBP-RFP                                                          | Vector backbone: pPB-CAG-3xFLAG-empty-pgk-hph (modified from addgene 48754);<br>Inserted CDS: full-length mouse RYBP-fused RFP                                                                                                                                |
| piggyBac-CTCF-EGFP                     | Cell line: CTCF-EGFP                                                         | Vector backbone: pPB-CAG-3xFLAG-empty-pgk-hph (modified from addgene 48754);<br>Inserted CDS: full-length mouse CTCF-fused EGFP                                                                                                                               |
| piggyBac-RYBP_ $\Delta$ IDR21-RFP      | Cell line: RYBP- $\Delta$ IDR21-RFP                                          | Vector backbone: pPB-CAG-3xFLAG-empty-pgk-hph (modified from addgene 48754);<br>Inserted CDS: mutant mouse RYBP (deletion of 21 amino acid residues in RYBP IDR, including 75-77aa, 86-88aa, 107-109aa, 153-155aa, 165-167aa, 183-185aa, 215-217aa) fused RFP |
| piggyBac-RYBP_ $\Delta$ IDR21-HNRNPA1C | Cell line: RYBP_ $\Delta$ IDR21-HNRNPA1C                                     | Vector backbone: pPB-CAG-3xFLAG-empty-pgk-hph (modified from addgene 48754);<br>Inserted CDS: RYBP- $\Delta$ IDR21-RFP fused C-terminal of human HNRNPA1 (186-320) fused CTCF                                                                                 |
| plko.shEV                              | Cell line:shEV                                                               | Vector backbone: pLKO.1 puro (modified from addgene 8453)                                                                                                                                                                                                     |
| plko.sh <i>Rybp</i>                    | Cell line:sh <i>Rybp</i>                                                     | targeting sequence: CCAGGAAACCTCGCATCAATT                                                                                                                                                                                                                     |
