# Supplementary material
Source: PubMed Central journal article supplement (PMC9343660)
Supplement: 41422_2022_676_MOESM15_ESM.pdf [file 41422_2022_676_MOESM15_ESM.pdf]

**Table S3. Primers used for ChIP-qPCR analysis**

| <b>Name</b> | <b>Orientation</b> | <b>Sequence</b>      |
|-------------|--------------------|----------------------|
| Peak1       | F                  | CCGCCTACCTGCCTCTTACC |
|             | R                  | ACTTCCCTGCCTGCGAGTG  |
| Peak2       | F                  | GGGGACGAAGTCCGATGA   |
|             | R                  | CGTGCTCAGGCACAGGAA   |
| Peak3       | F                  | TCCAACCGGACCACGAAT   |
|             | R                  | TGGTGGAGGGCTGCTTATTC |
