# Supplementary material
Source: PubMed Central journal article supplement (PMC9343660)
Supplement: 41422_2022_676_MOESM16_ESM.pdf [file 41422_2022_676_MOESM16_ESM.pdf]

**Table S4. Primers used for 3C-qPCR analysis**

| Name                      | Orientation | Sequence                  |
|---------------------------|-------------|---------------------------|
| Contact 1                 | F           | TTCAAAGGTGTTCTGGGAGT      |
|                           | R           | CCCCAATGACAATGGAAAT       |
| Contact 2                 | F           | CCTGAGCCTGAGTTTGCC        |
|                           | R           | AAGCAGGGTCTGAGATGAGG      |
| Contact 3                 | F           | GACAGGCTGGTGTGGG          |
|                           | R           | AACTTTAATCAGCAGGGACT      |
| Contact 4                 | F           | AGATGGCAGCGGGTGAG         |
|                           | R           | GCTGAATGTGGATGGGTGAC      |
| Contact 5                 | F           | CCTGGCTGTCCTGGTAA         |
|                           | R           | CTCGGAAATCTGCCGTCTC       |
| Contact 6                 | F           | CGGTAATAATCGCAGCAC        |
|                           | R           | ACCAGGTGGGTGATGAGA        |
| Contact_ <i>Cdt1-Mcm5</i> | F           | GGAAAGGGTTTATTTGACTT      |
|                           | R           | ATGTGCTGGGCTCTAATCC       |
| Contact_chr8              | F           | AAGAACTGAGGCTGGGATA       |
|                           | R           | CTTGGAGAAGGTACGGTAGG      |
| NPC_chr5                  | F           | GAATCCACCATCCTCCTG        |
|                           | R           | AGATCCTCCTGCCTCTGC        |
| B2M                       | F           | CTTGGGTCCCAGACTCTGC       |
|                           | R           | TATTAAGACAGGGAAGTAGAGGAGG |
