# Supplementary material
Source: PubMed Central journal article supplement (PMC9343660)
Supplement: 41422_2022_676_MOESM17_ESM.pdf [file 41422_2022_676_MOESM17_ESM.pdf]

**Table S5. Primers used for RT-qPCR analysis**

| Name           | Orientation | Sequence                 |
|----------------|-------------|--------------------------|
| <i>Smarca4</i> | F           | CAAAGACAAGCATATCCTAGCCA  |
|                | R           | CACGTAGTGTGTGTTAAGGACC   |
| <i>Mapk6</i>   | F           | CACATGAACTTGAACAGATGCAG  |
|                | R           | CAGTGCTTCTCGGCTGATCC     |
| <i>Uhrf1</i>   | F           | CCACACCGTGAAGTCTCTGTCT   |
|                | R           | GGCGCACATCATAATCGAAGA    |
| <i>Msh6</i>    | F           | CACTCGGCGACACCAAGAA      |
|                | R           | CTCCGTTGAGATCCTTTGCCT    |
| <i>OCT4</i>    | F           | GTGGAGGAAGCCGACAACAATGA  |
|                | R           | CAAGCTGATTGGCGATGTGAG    |
| <i>Stat3</i>   | F           | CACCTTGGATTGAGAGTCAAGAC  |
|                | R           | AGGAATCGGCTATATTGCTGGT   |
| <i>Sall4</i>   | F           | CCCTGGGAACTGCGATGAAG     |
|                | R           | TCAGAGAGACTAAAGAAGCTCGGC |
| <i>Lin28a</i>  | F           | GGGTTCCGAAGCCTCAA        |
|                | R           | CCGCTCACTCCCAATACAG      |
| <i>Nodal</i>   | F           | TTCAAGCCTGTTGGGCTCTAC    |
|                | R           | TCCGGTCACGTCCACATCTT     |
| <i>Tbx3</i>    | F           | GAACCTACCTGTTCCCGGAAA    |
|                | R           | CAATGCCCAATGTCTCGAAAAC   |
| <i>Rif1</i>    | F           | TTCTTTACCAAATTGTGGTGGCT  |
|                | R           | CTCCGACTTGTAGGCTGTGG     |
| <i>Sox1</i>    | F           | GTGACATCTGCCCCATC        |
|                | R           | GAGGCCAGTCTGGTGTGAG      |
| <i>Nestin</i>  | F           | CTGCAGGCCACTGAAAAGTT     |
|                | R           | TTCAGCCAAGGAGACAGTCA     |
| <i>Blbp</i>    | F           | GGCAAGATGGTCGTGACTCT     |
|                | R           | ACCTCCACACCGAAGACAAA     |
| <i>Tubb3</i>   | F           | AACCAGATAGGGGCCAAGTT     |
|                | R           | GGCCTGAATAGGTGTCCAAA     |
| <i>Reln</i>    | F           | GTACCGGGACAGGAATACCAT    |
|                | R           | AAGCTGAGGTTGTTGTAGGC     |
| <i>Neurod1</i> | F           | ATGACCAAATCATAACAGCGAGAG |
|                | R           | TCTGCCTCGTTCCTCGT        |
| <i>Nanog</i>   | F           | TGGTCCCCACAGTTTGCCTAGTTC |
|                | R           | CAGGTCTTCAGAGGAAGGGCGA   |
| <i>Rybp</i>    | F           | AGGCCAAAAAGACAAGCGAAA    |
|                | R           | TTCGGCGCTGTTCTAAAGG      |
| <i>Yaf2</i>    | F           | AGACAGTACGACGTGGCTTG     |
|                | R           | GGGTTGGAACAGGGAGACAG     |
| <i>Gapdh</i>   | F           | GAACGGATTTGGCCGTATTG     |
|                | R           | TGCCGTGAGTGGAGTCATACTG   |
