# Supplementary material
Source: PubMed Central journal article supplement (PMC9343660)
Supplement: 41422_2022_676_MOESM18_ESM.pdf [file 41422_2022_676_MOESM18_ESM.pdf]

**Table S6. Quality Control of Hi-C and HiChIP data in this study**

| Samples                                                 | Raw read pairs | Unique paired alignments | Valid Pairs | Valid pairs + remove duplicates | CIS short (<= 20 kb) | CIS long (> 20kb) |
|---------------------------------------------------------|----------------|--------------------------|-------------|---------------------------------|----------------------|-------------------|
| Hi-C ( <i>Rybp</i> <sup>+/+</sup> mESC) rep1            | 58878841       | 30237149                 | 25281888    | 23454282                        | 1644444              | 11273199          |
| Hi-C ( <i>Rybp</i> <sup>+/+</sup> mESC) rep2            | 67683189       | 33800552                 | 28078458    | 25727413                        | 1809654              | 12360750          |
| Hi-C ( <i>Rybp</i> <sup>-/-</sup> mESC) rep1            | 66824331       | 39607444                 | 36281223    | 33530718                        | 2968622              | 19722620          |
| Hi-C ( <i>Rybp</i> <sup>-/-</sup> mESC) rep2            | 65312801       | 37981448                 | 34738085    | 32080495                        | 2788210              | 18982806          |
| Hi-C ( <i>Rybp</i> <sup>-/-</sup> _EV mESC) rep1        | 150115873      | 82141559                 | 79208627    | 64901050                        | 4597734              | 36013219          |
| Hi-C ( <i>Rybp</i> <sup>-/-</sup> _EV mESC) rep2        | 91399955       | 50545819                 | 48730350    | 40423321                        | 2861905              | 22420563          |
| Hi-C (induced CTCF phase separation_vehicle mESC) rep1  | 82423763       | 43350031                 | 40207464    | 36196468                        | 3558584              | 21826376          |
| Hi-C (induced CTCF phase separation_vehicle mESC) rep2  | 82006610       | 43130240                 | 39849250    | 35774493                        | 3498832              | 21612046          |
| Hi-C (induced CTCF phase separation_1,6-hex mESC) rep1  | 60020414       | 30118198                 | 27731958    | 24869029                        | 2900952              | 14650033          |
| Hi-C (induced CTCF phase separation_1,6-hex mESC) rep2  | 80055618       | 40542031                 | 36536843    | 32495636                        | 3718778              | 19159170          |
| Hi-C ( <i>Rybp</i> <sup>+/+</sup> _EV mESC) rep1        | 57752354       | 27296356                 | 20680258    | 18982038                        | 1747788              | 9587348           |
| Hi-C ( <i>Rybp</i> <sup>+/+</sup> _EV mESC) rep2        | 54211362       | 24383086                 | 18874840    | 17360676                        | 1568591              | 8627194           |
| Hi-C ( <i>Rybp</i> <sup>-/-</sup> _Δ172 mESC) rep1      | 52347117       | 20651848                 | 13278221    | 11995402                        | 1100322              | 5786352           |
| Hi-C ( <i>Rybp</i> <sup>-/-</sup> _Δ172 mESC) rep2      | 40493897       | 15611827                 | 9712348     | 8717755                         | 800878               | 4202423           |
| Hi-C ( <i>Rybp</i> <sup>-/-</sup> _hIDR-CTCF mESC) rep1 | 96391176       | 52584843                 | 51046541    | 41231647                        | 2920139              | 22876986          |
| Hi-C ( <i>Rybp</i> <sup>-/-</sup> _hIDR-CTCF mESC) rep2 | 130461887      | 70283258                 | 68232479    | 56429087                        | 3995278              | 31300901          |
| CTCF HiChIP ( <i>Rybp</i> <sup>+/+</sup> mESC) rep1     | 66834184       | 44131705                 | 35750821    | 31568422                        | 4196626              | 17353496          |
| CTCF HiChIP ( <i>Rybp</i> <sup>+/+</sup> mESC) rep2     | 61695698       | 40066414                 | 32407867    | 28421199                        | 3750792              | 15620432          |
| CTCF HiChIP ( <i>Rybp</i> <sup>-/-</sup> mESC) rep1     | 57320877       | 35633298                 | 28444062    | 25840916                        | 3542195              | 14847888          |
| CTCF HiChIP ( <i>Rybp</i> <sup>-/-</sup> mESC) rep2     | 66736612       | 41729627                 | 33405547    | 29559054                        | 4056656              | 16968361          |
