# Supplementary material
Source: PubMed Central journal article supplement (PMC9343660)
Supplement: 41422_2022_676_MOESM19_ESM.pdf [file 41422_2022_676_MOESM19_ESM.pdf]

**Table S7. Deposited Data**

| <b>Data</b>                                                | <b>Source</b>                  | <b>Accession</b> |
|------------------------------------------------------------|--------------------------------|------------------|
| Hi-C ( <i>Rybp</i> <sup>+/+</sup> mESC) rep1               | This paper                     | GEO: GSE147919   |
| Hi-C ( <i>Rybp</i> <sup>+/+</sup> mESC) rep2               | This paper                     | GEO: GSE147919   |
| Hi-C ( <i>Rybp</i> <sup>-/-</sup> mESC) rep1               | This paper                     | GEO: GSE147919   |
| Hi-C ( <i>Rybp</i> <sup>-/-</sup> mESC) rep2               | This paper                     | GEO: GSE147919   |
| Hi-C ( <i>Rybp</i> <sup>-/-</sup> _EV mESC) rep1           | This paper                     | GEO: GSE147919   |
| Hi-C ( <i>Rybp</i> <sup>-/-</sup> _EV mESC) rep2           | This paper                     | GEO: GSE147919   |
| Hi-C ( <i>Rybp</i> <sup>-/-</sup> _hIDR-CTCF mESC) rep1    | This paper                     | GEO: GSE147919   |
| Hi-C ( <i>Rybp</i> <sup>-/-</sup> _hIDR-CTCF mESC) rep2    | This paper                     | GEO: GSE147919   |
| Hi-C (induced CTCF phase separation_vehicle mESC) rep1     | This paper                     | GEO: GSE147919   |
| Hi-C (induced CTCF phase separation_vehicle mESC) rep2     | This paper                     | GEO: GSE147919   |
| Hi-C (induced CTCF phase separation_1,6-hex mESC) rep1     | This paper                     | GEO: GSE147919   |
| Hi-C (induced CTCF phase separation_1,6-hex mESC) rep2     | This paper                     | GEO: GSE147919   |
| Hi-C ( <i>Rybp</i> <sup>+/+</sup> _EV mESC) rep1           | This paper                     | GEO: GSE147919   |
| Hi-C ( <i>Rybp</i> <sup>+/+</sup> _EV mESC) rep2           | This paper                     | GEO: GSE147919   |
| Hi-C ( <i>Rybp</i> <sup>-/-</sup> _Δ172 mESC) rep1         | This paper                     | GEO: GSE147919   |
| Hi-C ( <i>Rybp</i> <sup>-/-</sup> _Δ172 mESC) rep2         | This paper                     | GEO: GSE147919   |
| CTCF HiChIP ( <i>Rybp</i> <sup>+/+</sup> mESC) rep1        | This paper                     | GEO: GSE147919   |
| CTCF HiChIP ( <i>Rybp</i> <sup>+/+</sup> mESC) rep2        | This paper                     | GEO: GSE147919   |
| CTCF HiChIP ( <i>Rybp</i> <sup>-/-</sup> mESC) rep1        | This paper                     | GEO: GSE147919   |
| CTCF HiChIP ( <i>Rybp</i> <sup>-/-</sup> mESC) rep2        | This paper                     | GEO: GSE147919   |
| RNA-seq (shEV mESC) rep1                                   | This paper                     | GEO: GSE147919   |
| RNA-seq (shEV mESC) rep2                                   | This paper                     | GEO: GSE147919   |
| RNA-seq (sh <i>Rybp</i> mESC) rep1                         | This paper                     | GEO: GSE147919   |
| RNA-seq (sh <i>Rybp</i> mESC) rep2                         | This paper                     | GEO: GSE147919   |
| RNA-seq ( <i>Rybp</i> <sup>-/-</sup> _EV mESC) rep1        | This paper                     | GEO: GSE147919   |
| RNA-seq ( <i>Rybp</i> <sup>-/-</sup> _EV mESC) rep2        | This paper                     | GEO: GSE147919   |
| RNA-seq ( <i>Rybp</i> <sup>-/-</sup> _hIDR-CTCF mESC) rep1 | This paper                     | GEO: GSE147919   |
| RNA-seq ( <i>Rybp</i> <sup>-/-</sup> _hIDR-CTCF mESC) rep2 | This paper                     | GEO: GSE147919   |
| RYBP ChIP-seq (mESC)                                       | (Zepeda-Martinez et al., 2020) | GEO: GSM4052120  |
| Input ChIP-seq (mESC)                                      | (Zepeda-Martinez et al., 2020) | GEO: GSM4052103  |
| RING1B ChIP-seq (mESC)                                     | (Jaensch et al., 2021)         | GEO: GSM4593063  |
| H3K9me3 ChIP-seq (mESC)                                    | (ENCODE project, 2011)         | GEO: GSM1003751  |
| H2AK119ub1 ChIP-seq (mESC)                                 | (Brookes et al., 2012)         | GEO: GSM850471   |
| H3K4me3 ChIP-seq (mESC)                                    | (Das et al., 2014)             | GEO: GSM1059001  |
| H3K27me3 ChIP-seq (mESC)                                   | (Das et al., 2014)             | GEO: GSM1058999  |
| H3K27ac ChIP-seq (mESC)                                    | (Shen et al., 2012)            | GEO: GSM851278   |
| RYBP ChIP-seq (mesoderm precursor cells)                   | (Morey et al., 2015)           | GEO: GSE67868    |
| H3K4me3 ChIP-seq (mesoderm precursor cells)                | (Morey et al., 2015)           | GEO: GSE67868    |
| H3K27me3 ChIP-seq (mesoderm precursor cells)               | (Morey et al., 2015)           | GEO: GSE67868    |
| RYBP ChIP-seq (epidermal progenitor cells)                 | (Cohen et al., 2018)           | GEO: GSE112460   |
| H3K4me3 ChIP-seq (epidermal progenitor cells)              | (Cohen et al., 2018)           | GEO: GSE112460   |
| H3K27me3 ChIP-seq (epidermal progenitor cells)             | (Cohen et al., 2018)           | GEO: GSE112460   |
| CTCF ChIP-seq (mESC)                                       | (Shen et al., 2012)            | GEO: GSE29218    |
| Input ChIP-seq (mESC)                                      | (Shen et al., 2012)            | GEO: GSE29218    |
| SMC1 ChIP-seq (mESC)                                       | (Kagey et al., 2010)           | GEO: GSE22562    |
| SMC3 ChIP-seq (mESC)                                       | (Kagey et al., 2010)           | GEO: GSE22562    |
| CTCF PLAC-seq (mESC)                                       | (Juric I et al., 2019)         | GEO: GSE119663   |
| CTCF ChIA-PET (mESC)                                       | (Weintraub et al., 2017)       | GEO: GSM2645441  |
| CTCF ChIA-PET (NB4)                                        | (Wang et al., 2020)            | GEO: GSE137661   |
| CTCF ChIA-PET (PAECs)                                      | (Reyes-Palomares et al., 2020) | GEO: GSE139234   |
| RNAseq rep1 (mESC)                                         | (Bonev et al., 2017)           | GEO: GSM2533843  |
| RNAseq rep2 (mESC)                                         | (Bonev et al., 2017)           | GEO: GSM2533844  |
| RNAseq rep1 (mNPC)                                         | (Bonev et al., 2017)           | GEO: GSM2533845  |
| RNAseq rep2 (mNPC)                                         | (Bonev et al., 2017)           | GEO: GSM2533846  |
| Hi-C (mESC)                                                | (Bonev et al., 2017)           | GEO: GSM2533818  |
| Hi-C (mNPC)                                                | (Bonev et al., 2017)           | GEO: GSM2533822  |

|                             |                       |                          |
|-----------------------------|-----------------------|--------------------------|
| Hi-C (mESC)                 | (Nora et al., 2017)   | GEO: GSE98671            |
| Hi-C (CTCF-AID) (mESC)      | (Nora et al., 2017)   | GEO: GSE98671            |
| Hi-C (SCC1-AID) (mESC)      | (Rhodes et al., 2020) | ArrayExpress: ERR3252815 |
| Hi-C (SCC1-AID) (mESC)      | (Rhodes et al., 2020) | ArrayExpress: ERR3252816 |
| Hi-C (SCC1-AID) (mESC)      | (Rhodes et al., 2020) | ArrayExpress: ERR3252817 |
| Hi-C (SCC1-AID) (mESC)      | (Rhodes et al., 2020) | ArrayExpress: ERR3252818 |
| Hi-C (untreated) (mESC)     | (Rhodes et al., 2020) | ArrayExpress: ERR3252823 |
| Hi-C (untreated) (mESC)     | (Rhodes et al., 2020) | ArrayExpress: ERR3252824 |
| Hi-C (untreated) (mESC)     | (Rhodes et al., 2020) | ArrayExpress: ERR3252825 |
| Hi-C (untreated) (mESC)     | (Rhodes et al., 2020) | ArrayExpress: ERR3252826 |
| Hi-C rep1 (mESC)            | (Nora et al., 2020)   | GEO: GSE156868           |
| Hi-C rep2 (mESC)            | (Nora et al., 2020)   | GEO: GSE156868           |
| Hi-C (CTCF-AID) rep1 (mESC) | (Nora et al., 2020)   | GEO: GSE156868           |
| Hi-C (CTCF-AID) rep2 (mESC) | (Nora et al., 2020)   | GEO: GSE156868           |
| Hi-C AML12 shCtrl           | (Huo et al., 2019)    | GEO:GSE125037            |
| Hi-C AML12 shSafb           | (Huo et al., 2019)    | GEO:GSE125037            |
