# Supplementary material
Source: PubMed Central journal article supplement (PMC9343660)
Supplement: 41422_2022_676_MOESM20_ESM.pdf [file 41422_2022_676_MOESM20_ESM.pdf]

**Table S8. Softwares and Algorithms**

| <b>Name</b>              | <b>Source</b>                 | <b>Website</b>                                                                                                                  |
|--------------------------|-------------------------------|---------------------------------------------------------------------------------------------------------------------------------|
| R-3.3.2                  | R Core Team                   | <a href="https://www.R-project.org/">https://www.R-project.org/</a>                                                             |
| RStudio                  | RStudio                       | <a href="https://www.rstudio.com">https://www.rstudio.com</a>                                                                   |
| Python 2.7.16            | Python                        | <a href="https://www.python.org/">https://www.python.org/</a>                                                                   |
| FastQC v-0.11.8          | Babraham Bioinformatics       | <a href="http://www.bioinformatics.babraham.ac.uk/projects/fastqc">http://www.bioinformatics.babraham.ac.uk/projects/fastqc</a> |
| Sratoolkit v-2.8.1       | SRA Toolkit Development Team  | <a href="https://github.com/ncbi/sra-tools/">https://github.com/ncbi/sra-tools/</a>                                             |
| Cutadapt v-2.4           | Marcel Martin                 | <a href="http://code.google.com/p/cutadapt/">http://code.google.com/p/cutadapt/</a>                                             |
| Bowtie2 v-2.2.5          | (Langmead and Salzberg, 2012) | <a href="http://bowtie-bio.sourceforge.net/bowtie2">http://bowtie-bio.sourceforge.net/bowtie2</a>                               |
| Samtools v-1.9           | (Li et al., 2009)             | <a href="http://samtools.sourceforge.net">http://samtools.sourceforge.net</a>                                                   |
| Bedtools v-2.27.1        | (Quinlan and Hall, 2010)      | <a href="https://github.com/ark5x/bedtools2">https://github.com/ark5x/bedtools2</a>                                             |
| HiC-Pro v-2.11.1         | (Servant et al., 2015)        | <a href="http://github.com/nservant/HiC-Pro">http://github.com/nservant/HiC-Pro</a>                                             |
| Hichipper v-0.7.7        | (Lareau and Aryee, 2018)      | <a href="http://aryee.mgh.harvard.edu/hichipper">http://aryee.mgh.harvard.edu/hichipper</a>                                     |
| Star v-2.6.1b            | (Dobin et al., 2013)          | <a href="https://github.com/alexdobin/STAR">https://github.com/alexdobin/STAR</a>                                               |
| EdgeR v-3.16.5           | (Robinson et al., 2010)       | <a href="https://bioconductor.org/packages/edgeR">https://bioconductor.org/packages/edgeR</a>                                   |
| Homer v-4.11.1           | (Heinz et al., 2010)          | <a href="http://homer.ucsd.edu/homer">http://homer.ucsd.edu/homer</a>                                                           |
| Picard v-1.118           | Broad Institute               | <a href="https://github.com/broadinstitute/picard">https://github.com/broadinstitute/picard</a>                                 |
| MACS2 v-2.1.2            | (Zhang et al., 2008)          | <a href="https://taoliu.github.io/MACS/">https://taoliu.github.io/MACS/</a>                                                     |
| FeatureCounts v-1.6.0    | (Liao et al., 2014)           | <a href="http://subread.sourceforge.net">http://subread.sourceforge.net</a>                                                     |
| BSgenome v-1.54.0        | Hervé Pagès                   | <a href="https://bioconductor.org/packages/BSgenome/">https://bioconductor.org/packages/BSgenome/</a>                           |
| GenomicFeatures v-1.38.1 | (Costa et al., 2013)          | <a href="https://bioconductor.org/packages/GenomicFeatures/">https://bioconductor.org/packages/GenomicFeatures/</a>             |
| Ngsplot v-2.61           | (Shen et al., 2014)           | <a href="https://github.com/shenlab-sinai/ngsplot">https://github.com/shenlab-sinai/ngsplot</a>                                 |
| BiomaRt v-2.42.0         | (Durinck et al., 2009)        | <a href="https://bioconductor.org/packages/biomaRt/">https://bioconductor.org/packages/biomaRt/</a>                             |
| David v-6.8              | (Huang da et al., 2009)       | <a href="https://david.ncifcrf.gov">https://david.ncifcrf.gov</a>                                                               |
| diffloop v-1.14.0        | PMID: 29028898                | <a href="https://github.com/aryeelab/diffloop">https://github.com/aryeelab/diffloop</a>                                         |
| juicer v-1.11.04         | PMID: 27467249                | <a href="http://aidenlab.org/juicer/">http://aidenlab.org/juicer/</a>                                                           |
| DeepTools v-3.2.1        | PMID: 24799436                | <a href="https://usegalaxy.eu/">https://usegalaxy.eu/</a>                                                                       |
| ChIA-PET2                | PMID: 27625391                | <a href="https://github.com/GuipengLi/ChIA-PET2">https://github.com/GuipengLi/ChIA-PET2</a>                                     |
| GENOVA_1.0.0             | (biiorxiv)                    | <a href="https://github.com/robinweide/GENOVA">https://github.com/robinweide/GENOVA</a>                                         |
