# Supplementary material
Source: PubMed Central journal article supplement (PMC9343660)
Supplement: 41422_2022_676_MOESM23_ESM.pdf [file 41422_2022_676_MOESM23_ESM.pdf]

### **Supplementary information, Video legend**

Video S1: Droplet fusion behavior of RYBP puncta in RYBP-EGFP expressed ESC, the yellow box denotes the fused puncta.

Video S2: Representative field of FRAP in RYBP-EGFP expressed ESC, the yellow box denotes the bleached RYBP puncta.
